# Supplementary material for: The number of cytokinesis nodes in mitotic fission yeast scales with cell size
Source: eLife. 2022 Sep 12;11:e76249. doi: 10.7554/eLife.76249 (PMC9467510; doi:10.7554/eLife.76249)
Supplement: Figure 2—source data 1. [file elife-76249-fig2-data1.xlsx]

## Sheet: Figure 2D
	WT raw data	NodeInt	AvgBgInt	BgSubNodeInt				Figure 2D			Figure 2E
		7368	1715.94	5652.06					Unitary node Intensity (a.u.)			Blt1-mEGFP Intesnity (a. u.)
		4031	1326.62	2704.38					WT			Node Broad Band	Contractile ring
		2796	1759.81	1036.19					5652.06			479184	359923
		3244	1543.56	1700.44					2704.38			460299	434561
		3286	1104.56	2181.44					1036.19			398948	436702
		2202	1222.31	979.688					1700.44			487457	562043
		2453	1104.56	1348.44					2181.44			358726	507355
		3844	1755.75	2088.25					979.688			435097	468623
		3519	1513.25	2005.75					1348.44			388997	329354
		4550	1358.62	3191.38					2088.25			355593	432065
		3717	1326.62	2390.38					2005.75			298164	503828
		7824	1437.62	6386.38					3191.38			310472	576992
		2763	1358.62	1404.38					2390.38			272896	261356
		4661	1436.19	3224.81					6386.38			595345	416199
		4184	1152.94	3031.06					1404.38			441942	244530
		3467	1641.38	1825.62					3224.81			488764	317876
		5158	1283.44	3874.56					3031.06			453541	216973
		3790	1152.94	2637.06					1825.62			447664	322888
		4174	1262.19	2911.81					3874.56			423112	296376
		3057	1761.69	1295.31					2637.06			598048	398147
		3879	1761.69	2117.31					2911.81			402794	448751
		6716	1283.44	5432.56					1295.31			519000	327550
		3904	1037.69	2866.31					2117.31			623038	160360
		3786	1262.19	2523.81					5432.56				269650
		4108	1152.94	2955.06					2866.31				241135
		3864	1641.38	2222.62					2523.81
		4788	1363.56	3424.44					2955.06
		4162	1363.56	2798.44					2222.62
		3994	1508.31	2485.69					3424.44
		2455	2174.69	280.312					2798.44
		2359	1363.56	995.438					2485.69
		2987	1416.81	1570.19					280.312
		5048	2129.31	2918.69					995.438
		4250	2190	2060					1570.19
		3490	1363.56	2126.44					2918.69
		4973	1363.56	3609.44					2060
		5865	1894.19	3970.81					2126.44
		2816	1604.81	1211.19					3609.44
		5316	1894.19	3421.81					3970.81
		5079	1505.38	3573.62					1211.19
		3793	1505.38	2287.62					3421.81
		3878	1644.94	2233.06					3573.62
		3256	1651.88	1604.12					2287.62
		3135	1643.19	1491.81					2233.06
		3377	1340.19	2036.81					1604.12
		3687	1450.69	2236.31					1491.81
		4538	1141	3397					2036.81
		3386	1505.38	1880.62					2236.31
		5622	1220.31	4401.69					3397
		6273	1220.31	5052.69					1880.62
		4250	1111.75	3138.25					4401.69
		3195	1500.56	1694.44					5052.69
		3756	1500.56	2255.44					3138.25
		3879	1500.56	2378.44					1694.44
		4588	2288.75	2299.25					2255.44
		3417	2234.12	1182.88					2378.44
		4259	2100.06	2158.94					2299.25
		3684	2100.06	1583.94					1182.88
		5262	1763.38	3498.62					2158.94
		5176	2393.12	2782.88					1583.94
		4085	1885.88	2199.12					3498.62
		6621	2068.06	4552.94					2782.88
		5531	1918.25	3612.75					2199.12
		4300	2393.12	1906.88					4552.94
		2731	1060.38	1670.62					3612.75
		2772	1060.38	1711.62					1906.88
		3322	1060.38	2261.62					1670.62
		4616	1121.25	3494.75					1711.62
		4746	1200.75	3545.25					2261.62
		4492	1200.75	3291.25					3494.75
		4536	1200.75	3335.25					3545.25
		3174	948.438	2225.56					3291.25
		2576	1206.38	1369.62					3335.25
		4279	1539.62	2739.38					2225.56
		2591	997.938	1593.06					1369.62
		3891	1163.19	2727.81					2739.38
		3107	1163.19	1943.81					1593.06
		2753	1163.19	1589.81					2727.81
		3587	1163.19	2423.81					1943.81
		2612	1102.56	1509.44					1589.81
		4255	1066.75	3188.25					2423.81
		3947	1095.69	2851.31					1509.44
		2715	1163.19	1551.81					3188.25
		3733	1344.19	2388.81					2851.31
		2052	1033.06	1018.94					1551.81
		2326	1473.62	852.375					2388.81
		4239	1289.38	2949.62					1018.94
		3259	1359.19	1899.81					852.375
		4681	1114.38	3566.62					2949.62
		4847	1114.38	3732.62					1899.81
		3101	1184.19	1916.81					3566.62
		5067	1438.62	3628.38					3732.62
		3780	1579.75	2200.25					1916.81
		3776	1140.94	2635.06					3628.38
		3215	1489.5	1725.5					2200.25
		3086	1489.5	1596.5					2635.06
		2380	1091.94	1288.06					1725.5
		2003	1026.38	976.625					1596.5
		4476	1124.5	3351.5					1288.06
		3323	1046.12	2276.88					976.625
		3013	1458.88	1554.12					3351.5
		3581	1954.12	1626.88					2276.88
		4800	1314.88	3485.12					1554.12
		2711	1458.88	1252.12					1626.88
		2483	1649.38	833.625					3485.12
		3487	1509.06	1977.94					1252.12
		3887	1458.88	2428.12					833.625
		3358	1562.06	1795.94					1977.94
		4748	1188.31	3559.69					2428.12
		2800	1188.31	1611.69					1795.94
		4227	1382.75	2844.25					3559.69
		4555	1382.75	3172.25					1611.69
		4916	1454.75	3461.25					2844.25
		4282	1526.44	2755.56					3172.25
		4309	1580.75	2728.25					3461.25
		4043	1580.75	2462.25					2755.56
		2807	1382.75	1424.25					2728.25
		3082	1547.25	1534.75					2462.25
		3781	1382.75	2398.25					1424.25
		2360	1239.88	1120.12					1534.75
		1916	1122.56	793.438					2398.25
		2147	958.625	1188.38					1120.12
		2611	847.375	1763.62					793.438
		3289	1307.25	1981.75					1188.38
		1511	962.625	548.375					1763.62
		2197	958.625	1238.38					1981.75
		3504	907.562	2596.44					548.375
		2483	847.375	1635.62					1238.38
		3073	1128.31	1944.69					2596.44
		3297	863.062	2433.94					1635.62
		3827	863.062	2963.94					1944.69
		3825	1297.12	2527.88					2433.94
		4044	962.625	3081.38					2963.94
		3004	1119.25	1884.75					2527.88
		3819	1481.12	2337.88					3081.38
		3936	1354.12	2581.88					1884.75
		5904	1408.75	4495.25					2337.88
		4280	1232.38	3047.62					2581.88
		2951	1354.12	1596.88					4495.25
		2607	1760.38	846.625					3047.62
		2388	1760.38	627.625					1596.88
		2726	1760.38	965.625					846.625
		3785	1117.88	2667.12					627.625
		3903	1117.88	2785.12					965.625
		4911	1473.25	3437.75					2667.12
		4428	1204.06	3223.94					2785.12
		4739	1393.31	3345.69					3437.75
		2246	743.812	1502.19					3223.94
		2505	487.688	2017.31					3345.69
		3079	583.875	2495.12					1502.19
		2886	409.062	2476.94					2017.31
		3275	842.938	2432.06					2495.12
		3868	855.625	3012.38					2476.94
		2356	325.25	2030.75					2432.06
		3026	613.25	2412.75					3012.38
		3439	868.25	2570.75					2030.75
		4067	743.812	3323.19					2412.75
		2678	877.312	1800.69					2570.75
		2468	284.5	2183.5					3323.19
		2737	284.5	2452.5					1800.69
		4000	284.5	3715.5					2183.5
		1934	748.625	1185.38					2452.5
		1718	284.5	1433.5					3715.5
		3111	582.125	2528.88					1185.38
		3843	748.625	3094.38					1433.5
		2756	1132.62	1623.38					2528.88
		2037	496.188	1540.81					3094.38
		2785	1073.56	1711.44					1623.38
		2914	313.375	2600.62					1540.81
		3848	489.75	3358.25					1711.44
		2586	802.688	1783.31					2600.62
		5167	400.562	4766.44					3358.25
		2096	400.562	1695.44					1783.31
		4142	977.062	3164.94					4766.44
		1960	1031.44	928.562					1695.44
		2833	534.875	2298.12					3164.94
		2213	591.75	1621.25					928.562
		3408	983.25	2424.75					2298.12
		2079	1063.12	1015.88					1621.25
		3759	1077.94	2681.06					2424.75
		2407	864.312	1542.69					1015.88
		2652	670.875	1981.12					2681.06
		1522	567.812	954.188					1542.69
		2745	567.812	2177.19					1981.12
		4565	452.188	4112.81					954.188
		4345	452.188	3892.81					2177.19
		4005	452.188	3552.81					4112.81
		3493	452.188	3040.81					3892.81
		4320	452.188	3867.81					3552.81
		5137	452.188	4684.81					3040.81
		2996	450.625	2545.38					3867.81
		3162	1361.94	1800.06					4684.81
		2210	1276.88	933.125					2545.38
		4100	1276.88	2823.12					1800.06
		3010	1361.94	1648.06					933.125
		2630	1257.75	1372.25					2823.12
		3368	1428.81	1939.19					1648.06
		3072	1554.88	1517.12					1372.25
		2812	1545.44	1266.56					1939.19
		2654	1574.81	1079.19					1517.12
		5258	1345.31	3912.69					1266.56
		5391	1257.75	4133.25					1079.19
		4517	1242.69	3274.31					3912.69
		4611	1242.69	3368.31					4133.25
		3644	1185.81	2458.19					3274.31
		4829	1530	3299					3368.31
		3659	1529.75	2129.25					2458.19
		4200	1530	2670					3299
		3676	2050.31	1625.69					2129.25
		3720	1962.62	1757.38					2670
		4963	1682.69	3280.31					1625.69
		6067	1998.19	4068.81					1757.38
		4604	1529.75	3074.25					3280.31
		6225	1682.69	4542.31					4068.81
		3014	1526.06	1487.94					3074.25
		3853	1923.88	1929.12					4542.31
		2247	1923.88	323.125					1487.94
		2370	903.875	1466.12					1929.12
		4486	1871.12	2614.88					323.125
		2969	1538.38	1430.62					1466.12
		2876	1125.19	1750.81					2614.88
		4643	1125.19	3517.81					1430.62
		5727	2031.5	3695.5					1750.81
		5451	1923.88	3527.12					3517.81
		4244	1675.31	2568.69					3695.5
		2007	948.062	1058.94					3527.12
		2973	1059.75	1913.25					2568.69
		2078	655.812	1422.19					1058.94
		2041	1218	823					1913.25
		1902	862.625	1039.38					1422.19
		1795	783.125	1011.88					823
		1767	469.125	1297.88					1039.38
		3445	506.875	2938.12					1011.88
		3580	1059.75	2520.25					1297.88
		4425	975.875	3449.12					2938.12
									2520.25
									3449.12
