# Supplementary material for: The number of cytokinesis nodes in mitotic fission yeast scales with cell size
Source: eLife. 2022 Sep 12;11:e76249. doi: 10.7554/eLife.76249 (PMC9467510; doi:10.7554/eLife.76249)
Supplement: Figure 3—figure supplement 1—source data 1. [file elife-76249-fig3-figsupp1-data1.xlsx]

## Sheet: Sheet1
		Figure 3_figure Supplement 1
			cdc25-22_surface area sorted	S	Node number		cdc25-22	D	Node number
				192.444	179.854			3.85487	192.397
				205.233	186.349			3.83958	320.551
				229.96	220.946			3.83432	220.946
				250.445	192.83			3.94155	262.62
				257.43	262.62			3.67196	186.349
				257.822	192.397			3.69205	179.854
				259.667	117.905			4.16367	210.643
				271.938	210.643			3.79001	204.204
				279.289	242.122			3.83432	345.625
				296.382	328.923			3.85487	378.655
				298.996	320.551			3.82972	310.631
				299.06	304.203			3.76419	419.967
				299.813	226.236			3.94475	297.111
				302.693	225.219			3.8896	248.402
				304.1	205.702			3.92788	272.274
				312.684	248.485			3.88874	348.262
				317.353	311.021			3.77556	328.923
				319.499	308.926			3.85422	308.926
				324.585	311.758			3.65268	311.758
				327.482	345.625			3.61382	356.034
				328.072	272.274			3.70114	309.649
				330.452	126.767			3.93792	117.905
				334.748	356.034			3.98797	192.83
				340.316	310.631			3.53457	205.702
				378.44	204.204			3.85007	226.236
				390.827	248.402			3.772	248.485
				400.652	378.655			3.85596	225.219
				410.242	309.649			3.81388	311.021
				427.868	419.967			3.7319	126.767
				462.783	348.262			3.87162	304.203
				463.255	297.111			3.76888	242.122
			Surface area 200-300	267.169	233.81			3.82078	264.976
				29.9353	61.9863			0.121683	72.958
			Surface area 300-400	331.635	267.311
				26.0875	65.5353
			Surface area >400	432.96	350.729
				29.1248	50.3546
			range	62.6028	122.857
