# Supplementary material for: The number of cytokinesis nodes in mitotic fission yeast scales with cell size
Source: eLife. 2022 Sep 12;11:e76249. doi: 10.7554/eLife.76249 (PMC9467510; doi:10.7554/eLife.76249)
Supplement: Figure 3—figure supplement 2—source data 1. [file elife-76249-fig3-figsupp2-data1.xlsx]

## Sheet: Sheet1
		Figure 3_figure Supplement 2
			WT		CRInt	L	D	L-D	V	S		WT		CRInt	L	D	L-D	V	S
				Image 01	359923	15.0497	3.90276	11.147	164.391	184.43			Image 01	324277	14.1538	3.80329	10.3505	146.321	169.029
				Image 02	434561	13.0959	3.8803	9.21559	139.499	159.562			Image 02	307160	12.561	3.7292	8.8318	123.557	147.085
				Image 03	436702	14.5769	3.65107	10.9259	139.802	167.115			Image 03	239657	12.9085	3.8777	9.03079	137.111	157.173
				Image 04	562043	15.9806	3.69205	12.2886	157.832	185.264			Image 04	414162	14.2114	3.485	10.7264	124.416	155.514
				Image 05	507355	15.3264	3.76218	11.5643	156.357	181.055			Image 05	290901	13.4935	3.88138	9.6121	144.275	164.452
				Image 06	468623	12.5085	3.80484	8.70366	127.737	149.441			Image 06	483425	15.0669	3.76933	11.2975	154.03	178.327
				Image 07	329354	14.4816	3.91824	10.5634	158.788	178.171			Image 07	298686	15.7604	3.91394	11.8465	173.836	193.692
				Image 08	432065	15.2028	3.66027	11.5425	147.057	174.729			Image 08	447087	13.8345	3.64347	10.191	131.51	158.274
				Image 09	503828	14.5841	3.83848	10.7456	153.884	175.78			Image 09	276413	13.8031	3.41065	10.3925	115.662	147.824
				Image 10	576992	14.0893	3.69205	10.3973	137.594	163.338			Image 10	349985	11.6914	3.89651	7.79489	123.864	143.045
				Image 11	261356	14.9368	3.59423	11.3426	139.325	168.575			Image 11	426622	12.443	3.73438	8.70863	122.59	145.906
				Image 12	402787	12.6024	3.2984	9.30402	98.2393	130.523			Image 12	246562	11.8064	3.88722	7.91914	124.674	144.107
				Image 13	416199	12.3134	3.81322	8.50017	126.041	147.434			Image 13	255131	13.2143	3.76531	9.44897	133.098	156.233
				Image 14	244530	14.3667	3.75077	10.616	144.853	169.203			Image 14	282793	13.0767	3.73123	9.34546	129.32	153.207
				Image 15	317876	13.7829	3.86445	9.91844	146.478	167.247			Image 15	235207	14.9125	3.72288	11.1896	148.746	174.325
				Image 16	216973	15.1826	3.53267	11.65	137.202	168.414
				Image 17	322888	13.16	3.6073	9.55268	122.145	149.062		cdc25-22		CRInt	L	D	L-D	V	S
				Image 18	296376	14.5149	3.59049	10.9244	134.778	163.643			Image 01	356860	33.0078	3.91652	29.0912	381.733	405.925
				Image 19	398147	15.0298	3.69205	11.3377	147.658	174.241			Image 02	855021	48.3767	3.89176	44.4849	559.749	591.169
				Image 20	448751	15.3562	3.45107	11.9052	132.814	166.406			Image 03	763744	41.1368	3.80682	37.33	453.543	491.726
				Image 21	327550	14.3583	3.86228	10.496	153.06	174.131			Image 04	629177	39.1202	3.91652	35.2037	455.335	481.095
				Image 22	160360	11.8266	3.91072	7.91584	126.335	145.226			Image 05	705379	34.8241	3.97763	30.8465	416.046	434.945
				Image 23	269651	13.1213	3.7829	9.33838	133.234	155.859			Image 06	666895	32.4489	3.92102	28.5279	375.849	399.511
				Image 24	241135	13.6438	3.82532	9.8185	142.079	163.883			Image 07	748278	39.1174	4.1002	35.0172	498.202	503.622
													Image 08	650314	42.9819	3.87575	39.1062	491.601	523.083
			cdc25-22		CRInt	L	D	L-D	V	S			Image 09	706257	42.9684	3.81851	39.1498	477.25	515.195
				Image 01	529606	21.741	4.04489	17.6961	261.914	276.132			Image 10	459905	31.8429	3.87618	27.9667	360.33	387.566
				Image 02	366389	23.669	3.56606	20.103	224.414	265.032			Image 11	693303	42.4151	3.91652	38.4986	495.009	521.616
				Image 03	254657	25.5678	4.27601	21.2918	346.519	343.29			Image 12	808756	37.9202	3.73123	34.189	400.83	444.275
				Image 04	284622	23.6482	3.85247	19.7957	260.554	286.066			Image 13	568870	45.1235	3.79798	41.3255	496.614	538.127
				Image 05	551730	30.5532	3.81322	26.74	334.238	365.829			Image 14	595581	32.1057	3.88722	28.2185	365.46	391.878
				Image 06	475290	30.6801	3.9846	26.6955	365.827	383.858
				Image 07	268060	28.015	3.93792	24.0771	325.052	346.407
				Image 08	555574	21.8539	3.78668	18.0672	231.781	259.847
				Image 09	413387	18.8194	3.21478	15.6046	143.985	189.971
				Image 10	466103	19.6432	4.17657	15.4666	249.916	257.609
				Image 11	387890	22.7237	3.80947	18.9142	244.402	271.815
				Image 12	394688	21.4928	4.223	17.2698	281.181	284.999
				Image 13	523478	19.6405	3.36425	16.2763	164.538	207.478
			wee1-50		CRInt	L	D	L-D	V	S
				Image 01	117421	6.19846	3.05306	3.14541	37.9083	59.4221
				Image 02	43980.9	6.81452	3.89068	2.92383	65.5651	83.2512
				Image 03	46366.1	8.4098	3.6333	4.7765	74.598	95.9438
				Image 04	147371	7.02346	3.42638	3.59707	54.2022	75.5643
				Image 05	64076.4	8.61166	3.68749	4.92417	78.8017	99.7121
				Image 06	70936	9.16201	3.54881	5.6132	78.8838	102.095
				Image 07	82925.1	6.50674	3.4809	3.02584	50.853	71.1188
				Image 08	196565	8.62073	3.68772	4.93301	78.9074	99.8233
				Image 09	88147	7.74553	3.83257	3.91296	74.5796	93.2117
				Image 10	46519.4	7.52101	3.61219	3.90882	64.7021	85.3054
				Image 11	113762	6.00591	3.70455	2.30136	51.399	69.8624
				Image 12	78380.1	7.80724	3.61103	4.19622	67.5943	88.5234
				Image 13	131061	7.46211	3.69569	3.76642	66.7981	86.5938
				Image 14	110544	8.51824	3.73438	4.78386	79.6244	99.8844
				Image 15	64056.3	7.67763	3.77935	3.89828	71.9602	91.1115
				Image 16	101643	9.00928	4.1086	4.90068	101.236	116.229
				Image 17	97316.6	6.80514	3.65337	3.15176	58.5414	78.0657
				Image 18	89314.4	8.3473	3.88874	4.45856	83.703	101.926
				Image 19	86391.1	7.98069	3.52433	4.45636	66.3605	88.3175
			rga4Δ		CRInt	L	D	L-D	V	S
				Image 01	201549	12.9293	4.22618	8.70313	161.525	171.575
				Image 02	155921	12.6618	4.47408	8.18776	175.529	177.881
				Image 03	162582	10.4418	4.76042	5.68139	157.525	156.081
				Image 04	295903	12.4657	3.87423	8.59146	131.662	151.646
				Image 05	331831	13.5836	4.1086	9.47497	161.851	175.242
				Image 06	184804	9.34944	4.22797	5.12147	111.419	124.122
				Image 07	204694	9.88517	4.49226	5.39291	132.875	139.437
				Image 08	182288	11.9958	4.24226	7.75358	149.494	159.793
				Image 09	354190	10.4002	3.6073	6.79289	93.9542	117.802
				Image 10	239206	13.0101	3.90018	9.10995	139.829	159.329
				Image 11	205443	12.5503	3.86445	8.68583	132.028	152.29
				Image 12	221259	11.7863	4.55026	7.23608	166.915	168.401
				Image 13	220150	11.0856	4.11739	6.96817	129.262	143.321
				Image 14	165815	11.0217	4.83348	6.1882	172.585	167.277
			rga2Δ		CRInt	L	D	L-D	V	S
				Image 01	553770	13.2059	3.1506	10.0553	94.7189	130.644
				Image 02	420995	12.4657	3.37547	9.09021	101.431	132.124
				Image 03	206185	13.4146	3.4462	9.96839	114.353	145.16
				Image 04	302558	14.9657	3.56016	11.4055	137.096	167.3
				Image 05	280130	14.9717	3.42467	11.5471	127.331	160.998
				Image 06	152613	12.8363	3.66715	9.16919	122.605	147.809
				Image 07	184869	12.6918	3.5004	9.1914	110.853	139.499
				Image 08	255489	12.9166	3.61173	9.3049	119.938	146.485
				Image 09	244932	11.8762	3.39509	8.48112	97.2206	126.607
				Image 10	146499	12.2139	3.58978	8.62416	111.451	137.675
