# Supplementary material for: The number of cytokinesis nodes in mitotic fission yeast scales with cell size
Source: eLife. 2022 Sep 12;11:e76249. doi: 10.7554/eLife.76249 (PMC9467510; doi:10.7554/eLife.76249)
Supplement: Figure 3—source data 1. [file elife-76249-fig3-data1.xlsx]

## Sheet: Sheet1
	Figure 3G																												Figure 3H-K
		wee1-50_raw data	NodeInt	AvgBgInt	BgSubNodeInt		rga2Δ_raw data	NodeInt	AvgBgInt	BgSubNodeInt		cdc25-22_raw data	NodeInt	AvgBgInt	BgSubNodeInt		rga4Δ_raw data	NodeInt	AvgBgInt	BgSubNodeInt		rga4Δ+HU_raw data	NodeInt	AvgBgInt	BgSubNodeInt					Strain
			1605	1072.5	532.5			2582	2105.69	476.312			2279	1918.62	360.375			2228	1809.94	418.062			1055	637.062	417.938					WT		NdBdInt	L	D	L-D	V	S	Node number	BB length	BB surface area	Node surface density
			2260	1587.5	672.5			2267	1615.25	651.75			1282	904.938	377.062			2336	1809.94	526.062			1151	617.875	533.125						Image 01	479184	13.5893	3.75995	9.82931	136.901	160.438	208.341	5.1	60.2118	3.46013
			2765	2086.69	678.312			2752	2088.5	663.5			1744	1345.81	398.188			1750	1115.94	634.062			2534	1965	569						Image 02	460299	12.8809	3.47558	9.40527	111.157	140.573	200.13	4.3	46.9273	4.26468
			3213	2526	687			2444	1754.88	689.125			2060	1652.94	407.062			2412	1733.38	678.625			1557	961.438	595.562						Image 03	398948	13.1011	3.70954	9.39155	128.163	152.601	173.456	3.8	44.2622	3.91883
			2848	2091.12	756.875			1886	1194.06	691.938			2438	1930.69	507.312			1848	1129.81	718.188			1547	917.25	629.75						Image 04	487457	15.4766	3.51597	11.9606	138.815	170.864	211.938	4.5	49.6807	4.266
			2154	1215.12	938.875			2405	1647.94	757.062			2647	1997.19	649.812			2426	1605.44	820.562			2007	1190.38	816.625						Image 05	358726	13.3801	3.65107	9.72907	127.279	153.395	155.968	5.6	64.2005	2.42939
			2223	1272.19	950.812			2528	1754.88	773.125			1841	1141.56	699.438			2484	1598	886			1717	830.438	886.562						Image 06	435097	14.462	3.75883	10.7032	146.503	170.691	189.172	3.8	44.8504	4.21786
			3050	2097	953			2974	2193.75	780.25			2175	1472.44	702.562			1579	663.25	915.75			1655	748.188	906.812						Image 07	388997	15.0116	3.69364	11.318	147.585	174.105	169.129	3.1	35.9539	4.70405
			2140	1145.94	994.062			2837	1984	853			1675	958.188	716.812			3419	2498.19	920.812			1819	901.188	917.812						Image 08	355593	14.907	3.75995	11.147	151.524	175.995	154.605	2.7	31.8768	4.85009
			3608	2571.62	1036.38			2220	1317.19	902.812			3155	2405.56	749.438			3305	2369.31	935.688			1838	912.812	925.188						Image 09	298164	14.2052	3.62473	10.5804	134.049	161.679	129.637	3.4	38.6977	3.34998
			3044	2004.75	1039.25			2972	2064.31	907.688			3111	2358.38	752.625			3823	2882.19	940.812			1680	734.75	945.25						Image 10	310472	14.074	3.54454	10.5294	127.153	156.642	134.988	5.8	64.5532	2.09111
			2100	1039.31	1060.69			2435	1502.94	932.062			2775	1997.19	777.812			2832	1845.5	986.5			1680	734.75	945.25						Image 11	272896	14.3322	3.8751	10.4571	153.72	174.392	118.651	2.6	31.6363	3.75046
			2884	1814.56	1069.44			2909	1963.19	945.812			2299	1514.38	784.625			3392	2305.75	1086.25			1493	506.938	986.062						Image 12	595345	14.7851	3.66371	11.1214	142.921	170.089	258.846	4.7	54.0691	4.78732
			1970	879.438	1090.56			2437	1444.69	992.312			1885	1066.38	818.625			3595	2503.44	1091.56			2119	1117.19	1001.81						Image 13	441942	12.9857	3.54122	9.44446	116.212	144.393	192.149	5.5	61.1569	3.1419
			2751	1658.38	1092.62			3110	2105.56	1004.44			2930	2110	820			2907	1809.94	1097.06			1969	954.75	1014.25						Image 14	488764	14.5623	3.87054	10.6918	156.082	176.983	212.506	3.6	43.7526	4.85699
			2333	1228.31	1104.69			2509	1478.56	1030.44			2278	1446.25	831.75			2532	1432.69	1099.31			2047	1031.44	1015.56						Image 15	453541	13.8602	3.84352	10.0167	145.873	167.274	197.192	3.4	41.0334	4.80564
			2244	1137.75	1106.25			2414	1381.75	1032.25			2604	1770.94	833.062			2729	1605.44	1123.56			1857	835.688	1021.31						Image 16	447664	14.8832	3.84461	11.0386	157.822	179.671	194.637	4.5	54.3244	3.58286
			2389	1272.19	1116.81			2679	1636.5	1042.5			2640	1756.69	883.312			1950	819.25	1130.75			1770	734.812	1035.19						Image 17	423112	15.0932	3.79621	11.297	156.431	179.912	183.962	5.3	63.1765	2.91187
			2433	1309.69	1123.31			2449	1317.19	1131.81			2331	1443.94	887.062			2215	1045.44	1169.56			2412	1369.31	1042.69						Image 18	598048	15.2592	3.8777	11.3815	164.857	185.795	260.021	3.4	41.3983	6.28095
			2278	1145.94	1132.06			3078	1921.38	1156.62			3006	2115.88	890.125			2400	1111.12	1288.88			1824	748.188	1075.81						Image 19	402794	12.9489	3.51765	9.43121	114.389	143.026	175.128	4.4	48.5998	3.60346
			2360	1206.75	1153.25			2651	1478.56	1172.44			1904	976.312	927.688			2890	1596.44	1293.56			1729	649.375	1079.62						Image 20	519000	13.9123	3.68544	10.2269	135.238	160.997	225.652	6	69.4337	3.24989
			1842	681.688	1160.31			3024	1724.31	1299.69			2923	1936.12	986.875			2813	1502.88	1310.12			1729	649.375	1079.62						Image 21	623038	14.1718	3.49151	10.6803	124.482	155.37	270.886	6.6	72.358	3.74369
			2173	989	1184			3055	1754.88	1300.12			3421	2432	989			2015	700.25	1314.75			1549	454.625	1094.38						AVG	439956	14.1848	3.69052	10.4943	138.912	164.518	191.285	4.38571	50.5787	3.91748
			2354	1163.25	1190.75			3487	2183.56	1303.44			2483	1480.25	1002.75			3724	2400.88	1323.12			1678	575.875	1102.12						STD	94922.9	0.80552	0.136179	0.757114	15.3847	13.0417	41.2708	1.1315	12.1997	0.955072
			2585	1369	1216			2899	1593.56	1305.44			2061	1040.12	1020.88			3232	1874.12	1357.88			3137	2028.62	1108.38
			2717	1493.94	1223.06			3431	2123.5	1307.5			2963	1927.75	1035.25			2200	841.625	1358.38			2092	958.75	1133.25					cdc25-22		NdBdInt	L	D	L-D	V	S	Node number	BB length	BB surface area	Node surface density		cdc25-22_volume sorted	Volume	Node number		cdc25-22_length sorted	L	Node number
			2467	1231.81	1235.19			3187	1850.75	1336.25			3125	2081.44	1043.56			3847	2467.31	1379.69			1575	406.562	1168.44						Image 01	461753	21.3	3.85487	17.4451	233.478	257.822	192.397	5.8	70.2049	2.7405			164.46	179.854			16.6	179.854
			3786	2542.94	1243.06			3294	1943.25	1350.75			3510	2432	1078			2653	1273.12	1379.88			2476	1250.19	1225.81						Image 02	769322	24.8	3.83958	20.9604	272.193	298.996	320.551	9.3	112.123	2.85891			175.447	186.349			17.8	186.349
			2861	1578.88	1282.12			3366	1984	1382			1851	751.625	1099.38			2860	1476.56	1383.44			2104	867.188	1236.81						Image 03	530269	19.1	3.83432	15.2657	205.684	229.96	220.946	5.9	71.0347	3.11039			205.684	220.946			19.1	220.946
			1887	580.75	1306.25			3284	1896	1388			2483	1373.38	1109.62			2759	1367.38	1391.62			1673	430.875	1242.12						Image 04	630288	20.8	3.94155	16.8585	237.645	257.43	262.62	5.2	64.3576	4.08064			233.096	192.83			20	192.83
			2497	1168.25	1328.75			2796	1402.75	1393.25			2877	1767	1110			2612	1185.31	1426.69			1556	302.75	1253.25						Image 05	447238	17.8	3.67196	14.128	175.447	205.233	186.349	5.2	59.9558	3.10811			233.478	192.397			20.8	262.62
			1838	505.562	1332.44			3028	1634.56	1393.44			1571	460.438	1110.56			3580	2124.25	1455.75			1509	245.312	1263.69						Image 06	431650	16.6	3.69205	12.908	164.46	192.444	179.854	6.4	74.1954	2.42406			237.645	262.62			20.8	210.643
			2064	668.812	1395.19			3329	1908.5	1420.5			1924	810	1114			2934	1476.56	1457.44			1901	620.938	1280.06						Image 07	505543	20.8	4.16367	16.6363	264.177	271.938	210.643	6.3	82.3657	2.55741			239.658	117.905			21	117.905
			2030.88	634.875	1396			2989	1543.75	1445.25			3150	2032.06	1117.94			3467	1994.25	1472.75			1934	637.062	1296.94						Image 08	490090	31.8	3.79001	28.01	344.327	378.44	204.204	8.34	99.2512	2.05745			249.143	242.122			21.3	192.397
			2924	1505	1419			3561	2100.81	1460.19			2153	1033.06	1119.94			3372	1875.31	1496.69			2194	860.312	1333.69						Image 09	829501	27.2	3.83432	23.3657	299.167	327.482	345.625	11.6	139.661	2.47474			257.161	205.702			23.6	242.122
			2945	1515.62	1429.38			2991	1527	1464			2919	1787.19	1131.81			3112	1598	1514			1956	620.938	1335.06						Image 10	908772	33.1	3.85487	29.2451	371.127	400.652	378.655	8.2	99.2553	3.81496			264.177	210.643			24.6	304.203
			3570	2128	1442			3026	1551.5	1474.5			3095	1953.62	1141.38			2572	1036.12	1535.88			2414	1070.81	1343.19						Image 11	745513	28.3	3.82972	24.4703	311.131	340.316	310.631	11.4	137.089	2.26591			265.669	328.923			24.8	320.551
			2359.31	915.312	1444			3377	1883.44	1493.56			2343	1182.81	1160.19			4423	2882.19	1540.81			2404	1037.06	1366.94						Image 12	1.00792e+06	36.2	3.76419	32.4358	388.689	427.868	419.967	9.5	112.286	3.74016			272.193	320.551			24.8	226.236
			2240	751.625	1488.38			3078	1577.88	1500.12			3444	2256.12	1187.88			2987	1444.44	1542.56			1908	521.062	1386.94						Image 13	713066	37.4	3.94475	33.4553	440.794	463.255	297.111	8	99.092	2.99833			273.642	226.236			25	328.923
			2434	931.5	1502.5			3397	1896	1501			2622	1427.38	1194.62			3466	1875.31	1590.69			2307	912.812	1394.19						Image 14	596165	32	3.8896	28.1104	364.643	390.827	248.402	5.4	65.9521	3.7664			274.276	304.203			25	225.219
			2106	580.75	1525.25			3212	1707.94	1504.06			1827	624.188	1202.81			2319	700.25	1618.75			1986	570.438	1415.56						Image 15	653457	26.6	3.92788	22.6721	306.3	328.072	272.274	6.7	82.6347	3.29491			276.791	225.219			26.4	308.926
			3605	2072.56	1532.44			3395	1879.25	1515.75			3279	2034.56	1244.44			3409	1779.56	1629.44			1708	279.312	1428.69						Image 16	835828	37.9	3.88874	34.0113	434.523	462.783	348.262	9.8	119.664	2.91032			280.818	248.485			26.4	248.485
			2669	1131.06	1537.94			3576	2054.44	1521.56			2591	1345.81	1245.19			2615	958.938	1656.06			1683	243.188	1439.81						Image 17	789416	25	3.77556	21.2244	265.669	296.382	328.923	6.1	72.3171	4.54835			283.649	311.758			26.5	311.021
			2620	1080.38	1539.62			2941	1402.75	1538.25			2637	1355.81	1281.19			3286	1610.94	1675.06			3406	1965	1441						Image 18	741422	26.4	3.85422	22.5458	292.873	319.499	308.926	6.9	83.5055	3.69946			288.071	311.021			26.6	272.274
			2424.44	883.438	1541			3213	1647.94	1565.06			3880	2575.69	1304.31			3213	1500.75	1712.25			2279	801.688	1477.31						Image 19	748219	28.3	3.65268	24.6473	283.649	324.585	311.758	9.3	106.666	2.92276			290.08	356.034			27.2	345.625
			1960	409.688	1550.31			3465	1899.06	1565.94			2857	1551.56	1305.44			2768	1054.81	1713.19			2718	1221	1497						Image 20	854481	29.5	3.61382	25.8862	290.08	334.748	356.034	9.5	107.8	3.30272			292.873	308.926			27.4	205.702
			2920	1369	1551			3763	2159.44	1603.56			2067	754.25	1312.75			3329	1605.44	1723.56			2468	958.75	1509.25						Image 21	743159	35.3	3.70114	31.5989	366.325	410.242	309.649	9.2	106.919	2.89612			294.704	126.767			28.2	126.767
			2756	1199.56	1556.44			3652	1990.12	1661.88			3175	1862.25	1312.75			2654	923.75	1730.25			1948	388.062	1559.94						Image 22	282971	21	3.93792	17.0621	239.658	259.667	117.905	8	98.9206	1.19191			299.167	345.625			28.3	310.631
			2368	797	1571			3112	1444.69	1667.31			2038	723	1315			3374	1641.88	1732.12			2762	1201.75	1560.25						Image 23	462793	20	3.98797	16.012	233.096	250.445	192.83	7.1	88.9079	2.16888			306.3	272.274			28.3	311.758
			2707	1127.75	1579.25			3653	1971.44	1681.56			1945	626	1319			2658	900.5	1757.5			3044	1482.38	1561.62						Image 24	493684	27.4	3.53457	23.8654	257.161	304.1	205.702	7.1	78.7997	2.61044			311.131	310.631			29.5	356.034
			2929	1348.12	1580.88			3522	1824.62	1697.38			3384	2034.56	1349.44			2916	1115.94	1800.06			2001	431.312	1569.69						Image 25	542966	24.8	3.85007	20.9499	273.642	299.813	226.236	12.5	151.115	1.49711			344.327	204.204			31.8	204.204
			2001	409.688	1591.31			3382	1675.5	1706.5			2438	1080.31	1357.69			3242	1440.38	1801.62			1823	245.312	1577.69						Image 26	596364	26.4	3.772	22.628	280.818	312.684	248.485	5.6	66.3268	3.74637			364.643	248.402			32	248.402
			2683	1085.12	1597.88			3324	1613.56	1710.44			1996	636	1360			2641	819.25	1821.75			3119	1540.75	1578.25						Image 27	540525	25	3.85596	21.144	276.791	302.693	225.219	6	72.6463	3.10021			366.325	309.649			33.1	378.655
			2973	1370	1603			3350	1630.81	1719.19			2313	949.562	1363.44			2967	1144.62	1822.38			1989	406.562	1582.44						Image 28	746450	26.5	3.81388	22.6861	288.071	317.353	311.021	9.4	112.571	2.7629			371.127	378.655			35.3	309.649
			2080.56	474.562	1606			3337	1615.25	1721.75			3420	2056.5	1363.5			4276	2444.38	1831.62			2355	744	1611						Image 29	304240	28.2	3.7319	24.4681	294.704	330.452	126.767	5.5	64.4499	1.9669			388.689	419.967			36.2	419.967
			4139	2526	1613			2896	1145.88	1750.12			3220	1841.44	1378.56			4473	2612.56	1860.44			2690	1070.81	1619.19						Image 30	730088	24.6	3.87162	20.7284	274.276	299.06	304.203	9.7	117.922	2.5797			434.523	348.262			37.4	297.111
			2530	914.25	1615.75			3520	1755.75	1764.25			2215	835.062	1379.94			3780	1919.38	1860.62			1937	302.75	1634.25						Image 31	581093	23.6	3.76888	19.8311	249.143	279.289	242.122	8.2	97.0411	2.49505			440.794	297.111			37.9	348.262
			1983.62	354.625	1629			3329	1544.62	1784.38			2466	1083.88	1382.12			3595	1714.38	1880.62			2221	584.125	1636.88
			2569	901.812	1667.19			3498	1713.06	1784.94			2572	1189.62	1382.38			4109	2213.81	1895.19			2221	584.125	1636.88					wee1-50		NdBdInt	L	D	L-D	V	S	Node number	BB length	BB surface area	Node surface density		Volume 150-250	217.326	199.378		Length 16-25	21.8	229.343
			2358	681.688	1676.31			3213	1415.19	1797.81			2195	791.688	1403.31			2691	716.188	1974.81			3002	1301.62	1700.38						Image 01	222725	6.76612	3.6683	3.09782	58.556	77.9352	101.239	1.7	19.5814	5.17015			31.8876	44.0328			2.85576	58.8159
			3085	1405.5	1679.5			3535	1733.12	1801.88			3070	1652	1418			3789	1812.38	1976.62			2339	620.938	1718.06						Image 02	337300	8.75463	3.77757	4.97706	83.9636	103.844	153.318	7.1	84.2171	1.82051
			2882	1166.31	1715.69			3145	1325.38	1819.62			2487	1066.38	1420.62			3795	1812.38	1982.62			3980	2256.44	1723.56						Image 03	279630	9.31169	3.54241	5.76929	80.095	103.576	127.105	5.4	60.0651	2.11611		Volume 250-350	286.766	271.6		Length 25-30	27.48	279.722
			2470	753.625	1716.38			3581	1740.56	1840.44			3840	2400.44	1439.56			4695	2710.81	1984.19			2158	424	1734						Image 04	394384	7.7567	4.00753	3.74917	80.9497	97.6074	179.265	3.7	46.5595	3.85025			21.0241	63.126			1.05914	69.8302
			2603	880.125	1722.88			3339	1491.56	1847.44			3509	2068.56	1440.44			2653	663.25	1989.75			2325	543.188	1781.81						Image 05	171913	7.84644	3.7222	4.12424	71.8438	91.707	78.1424	2.7	31.5568	2.47624
			2657	915.125	1741.88			3230	1381.75	1848.25			3444	1997.19	1446.81			3609	1610.94	1998.06			3315	1499.88	1815.12						Image 06	200445	8.4054	3.71859	4.68681	77.7848	98.1446	91.1115	3.3	38.532	2.36456		Volume 350-450	394.35	333.674		Length 30-40	34.8143	315.179
			2707.12	914.125	1793			3619	1747.38	1871.62			2264	810	1454			3468	1467.06	2000.94			1982	157.125	1824.88						Image 07	155696	6.53548	3.83761	2.69787	60.7672	78.7532	70.7708	4.8	57.8404	1.22355			34.6704	61.4296			2.52681	74.4266
			2475	681.688	1793.31			3400	1502.94	1897.06			2937	1477.25	1459.75			4229	2211.44	2017.56			3249	1422.19	1826.81						Image 08	324446	8.03066	3.88658	4.14409	79.8639	98.005	147.475	2.7	32.9504	4.47568		range	76.1512	171.565
			2398.69	598.688	1800			3498	1594.12	1903.88			2524	1057.81	1466.19			4047	2014.69	2032.31			2693	858.812	1834.19						Image 09	319154	8.03066	3.88658	4.14409	79.8639	98.005	145.07	2.1	25.6281	5.66059
			4347	2542.94	1804.06			3479	1560.44	1918.56			2732	1261.88	1470.12			3492	1432.69	2059.31			2325	486.688	1838.31						Image 10	400535	7.87339	3.7633	4.11009	73.5863	93.0379	182.061	3.2	37.8136	4.8147
			3636	1822	1814			3423	1491.56	1931.44			2720	1216.88	1503.12			4037	1972.06	2064.94			2592	734.812	1857.19						Image 11	330035	7.02058	3.85247	3.16811	66.8329	84.9264	150.016	3	36.2903	4.13378
			2343.56	505.562	1838			3486	1544.62	1941.38			3924	2416.62	1507.38			3961	1879.44	2081.56			2180	302.75	1877.25						Image 12	105356	9.8816	3.56724	6.31436	86.8318	110.685	47.8893	5.1	57.1257	0.838313
			3033	1169	1864			3738	1754.88	1983.12			3682	2173.06	1508.94			4104	1984.38	2119.62			2779	859.875	1919.12						Image 13	145683	7.979	3.94666	4.03234	81.4758	98.88	66.2195	6.3	78.0729	0.848175
			3048	1146.06	1901.94			3453	1469.75	1983.25			2346	835.062	1510.94			3244	1120.06	2123.94			2780	837.75	1942.25						Image 14	67494.3	8.33309	3.52981	4.80328	69.9959	92.3607	30.6792	4.08	45.2211	0.678426
			2802	884.562	1917.44			3749	1763.94	1985.06			2323	810	1513			2867	700.25	2166.75			2780	837.75	1942.25						Image 15	153718	7.32387	3.82708	3.49679	69.5391	88.0112	69.8719	2.71	32.5662	2.14554
			3279	1344	1935			4202	2213.69	1988.31			2535	995.5	1539.5			3473	1295.81	2177.19			2428	442.375	1985.62						Image 16	162759	9.12644	3.62009	5.50634	81.4742	103.741	73.9812	3.22	36.602	2.02123
			2950	1010.06	1939.94			3991	1975.38	2015.62			3540	1983.44	1556.56			3851	1667.81	2183.19			3031	994.938	2036.06						Image 17	182574	7.10803	3.69569	3.41234	63.0018	82.4849	82.988	3.92	45.4895	1.82433
			4024	2077.25	1946.75			3425	1386.25	2038.75			3049	1489.19	1559.81			4059	1871.06	2187.94			2776	720.562	2055.44						Image 18	160443	7.08292	3.81498	3.26794	66.3934	84.8466	72.9286	3.54	42.4058	1.71978
			3732	1777.25	1954.75			3394	1334.44	2059.56			3557	1987.56	1569.44			3315	1108.12	2206.88			3429	1365.75	2063.25						AVG	228572	7.95371	3.75915	4.19456	74.0455	93.6972	103.896	3.80944	44.9177	2.67677
			2874	915.125	1958.88			3568	1482	2086			3282	1705.88	1576.12			3275	1041.69	2233.31			3070	994.938	2075.06						STD	100943	0.912574	0.137907	0.988612	8.50173	9.33144	45.8833	1.43595	17.0151	1.58662
			3458	1496.94	1961.06			3682	1593.56	2088.44			3737	2159.12	1577.88			4382	2142.69	2239.31			3468	1390.38	2077.62
			2733	771.438	1961.56			4306	2213.5	2092.5			2456	875.25	1580.75			5137	2884.44	2252.56			2520	440.438	2079.56					rga2Δ		NdBdInt	L	D	L-D	V	S	Node number	BB length	BB surface area	Node surface density
			2514	538.5	1975.5			3978	1883.44	2094.56			2552	960.25	1591.75			3791	1530.62	2260.38			2885	801.688	2083.31						Image 01	626643	14.5981	3.8516	10.7465	155.048	176.549	298.401	3.78	45.7154	6.52737
			4505	2526	1979			3663	1561.44	2101.56			3818	2225.69	1592.31			3600	1295.81	2304.19			2463	374.5	2088.5						Image 02	460331	14.512	3.3595	11.1525	118.651	153.085	219.205	5.1	53.799	4.07452
			2607.31	624.312	1983			3454	1349.25	2104.75			2095	498.188	1596.81			3785	1473.81	2311.19			3281	1175.5	2105.5						Image 03	409887	13.4551	3.39311	10.062	111.383	143.356	195.184	4.4	46.8792	4.16356
			2869.12	868.125	2001			3900	1783.81	2116.19			3392	1791.69	1600.31			4037	1714.38	2322.62			3130	1008	2122						Image 04	348273	13.1001	3.17611	9.92395	95.3535	130.647	165.844	4.7	46.873	3.53815
			2575	571.312	2003.69			3443	1317.19	2125.81			3307	1705.88	1601.12			4043	1658.44	2384.56			3130	1008	2122						Image 05	394393	13.7323	3.45958	10.2727	118.186	149.175	187.806	4.2	45.625	4.1163
			3374	1344	2030			3774	1630.81	2143.19			2289	647.25	1641.75			3947	1531.5	2415.5			3535	1380.12	2154.88						Image 06	502263	15.3015	3.2887	12.0128	120.606	158.011	239.173	3.4	35.1102	6.81207
			2431	393	2038			3619	1438	2181			3506	1859.88	1646.12			4049	1612.25	2436.75			4054	1882.88	2171.12						Image 07	269994	13.0759	3.1033	9.97262	91.0324	127.416	128.568	3.4	33.1308	3.88063
			2427	381.375	2045.62			3534	1349.5	2184.5			4020	2373.06	1646.94			3499	1060.94	2438.06			2578	390.812	2187.19						Image 08	421229	13.6161	3.33212	10.284	108.995	142.463	200.585	3.6	37.6663	5.32534
			2476	420.938	2055.06			3619	1363.19	2255.81			1983	334.188	1648.81			3329	873.188	2455.81			2947	722.812	2224.19						Image 09	408146	15.4905	3.28921	12.2012	122.247	159.987	194.355	3.8	39.2469	4.95212
			3239	1163.25	2075.75			3841	1560.44	2280.56			3183	1514.38	1668.62			3713	1255.88	2457.12			2510	246.5	2263.5						Image 10	475693	14.0917	3.41877	10.6729	118.837	151.274	226.521	4	42.9398	5.27531
			3340	1262.75	2077.25			4063	1755.19	2307.81			2913	1222	1691			4869	2391.5	2477.5			2615	348.062	2266.94						Image 11	445904	15.1871	3.63122	11.5559	144.67	173.164	212.335	3.3	37.6267	5.64321
			3153.62	1070.62	2083			3823	1478.56	2344.44			3088	1385.19	1702.81			4373	1879.44	2493.56			3318	1036.06	2281.94						Image 12	347057	13.0179	3.27923	9.7387	100.662	134.043	165.265	5.4	55.6026	2.97225
			3614	1515.62	2098.38			4180	1834.38	2345.62			2898	1182	1716			3866	1367.38	2498.62			3014	714.562	2299.44						Image 13	400385	14.3282	3.20745	11.1207	107.078	144.305	190.659	6.03	60.7305	3.13944
			3918	1819.25	2098.75			3977	1629.19	2347.81			3913	2192.75	1720.25			4123	1610.94	2512.06			2817	517.375	2299.62						Image 14	382378	13.2982	3.57289	9.72534	121.326	149.191	182.085	3.39	38.0319	4.78768
			2943	840.812	2102.19			4307	1926.31	2380.69			3282	1556.5	1725.5			4206	1689.31	2516.69			2779	473.312	2305.69						Image 15	417421	14.2642	3.26768	10.9966	110.433	146.358	198.772	4.3	44.1202	4.50524
			2306	202.375	2103.62			4294	1871.06	2422.94			3613	1862.25	1750.75			3535	989.688	2545.31			3053	741.375	2311.62						Image 16	376923	13.0368	3.36225	9.67459	105.746	137.636	179.487	4.91	51.8372	3.46252
			3358	1241.75	2116.25			3895	1467.25	2427.75			2332	566.75	1765.25			4827	2219.81	2607.19			3053	741.375	2311.62						Image 17	417570	14.9763	3.38988	11.5864	124.903	159.411	198.843	5.32	56.6273	3.51143
			3779	1658.38	2120.62			4507	2078.81	2428.19			2354	587.688	1766.31			3999	1386.88	2612.12			3033	669.75	2363.25						Image 18	372665	12.5311	3.485	9.04605	108.396	137.126	177.459	5.1	55.8088	3.17978
			3285.94	1145.94	2140			3889	1460.62	2428.38			3198	1426.12	1771.88			4280	1659.31	2620.69			3033	669.75	2363.25						Image 19	369212	12.5311	3.485	9.04605	108.396	137.126	175.815	5.24	57.3408	3.06614
			2852	704.375	2147.62			4273	1844.44	2428.56			2809	1033.06	1775.94			3252	559.438	2692.56			2759	385.625	2373.38						Image 20	237284	14.1126	3.1359	10.9767	100.874	138.963	112.992	4.66	45.8857	2.46247
			3363	1206.75	2156.25			3874	1417.88	2456.12			3921	2132.38	1788.62			4324	1598	2726			3134	756.375	2377.62						AVG	404182	13.9128	3.37442	10.5384	114.641	147.464	192.468	4.4015	46.5299	4.26978
			3410	1241.75	2168.25			4106	1598.56	2507.44			3032	1242	1790			4344	1610.94	2733.06			3134	756.375	2377.62						STD	81306.7	0.912611	0.17802	0.912288	15.2403	13.1186	38.7175	0.808867	8.21993	1.19674
			3510	1333.94	2176.06			4457	1932.5	2524.5			3921	2125.38	1795.62			3462	700.25	2761.75			2595	206.625	2388.38
			3262	1083	2179			4173	1638.69	2534.31			3365	1563.62	1801.38			3859	1093	2766			3122	720.562	2401.44					rga4Δ		NdBdInt	L	D	L-D	V	S	Node number	BB length	BB surface area	Node surface density
			2730.5	544.5	2186			4432	1871.06	2560.94			3582	1768.75	1813.25			4812	2014.31	2797.69			2826	422.75	2403.25						Image 01	384722	11.638	4.76342	6.87459	179.012	174.071	174.874	2.4	35.8971	4.87153
			3167.44	973.438	2194			4071	1502.94	2568.06			3883	2061.81	1821.19			5088	2274.06	2813.94			4067	1645.88	2421.12						Image 02	253859	11.5981	4.19444	7.40363	140.869	152.753	115.391	2.5	32.9264	3.5045
			2481	286.625	2194.38			3957	1363.19	2593.81			3309	1487.5	1821.5			3880	1064.94	2815.06			2982	558.5	2423.5						Image 03	412634	11.6638	4.55912	7.10464	165.517	166.974	187.561	4.1	58.6941	3.19557
			4587	2391.38	2195.62			4496	1844.75	2651.25			2694	862.688	1831.31			4990	2159.56	2830.44			3442	1015.44	2426.56						Image 04	299149	10.445	4.26163	6.18339	128.66	139.77	135.977	2.9	38.8064	3.50398
			3571	1358.5	2212.5			4323	1634.56	2688.44			2984	1136.25	1847.75			4106	1255.88	2850.12			4489	2050.38	2438.62						Image 05	405909	11.4952	4.88313	6.61209	184.703	176.257	184.504	5.9	90.4649	2.03951
			3454	1234.31	2219.69			4168	1467.25	2700.75			3092	1242	1850			4944	2076.19	2867.81			3869	1422.19	2446.81						Image 06	217767	12.771	4.26479	8.50623	162.046	171.022	98.9851	2.8	37.496	2.63988
			3198.12	961.125	2237			4230	1460.62	2769.38			2459	587.688	1871.31			5619	2736.38	2882.62			3477	982.562	2494.44						Image 07	176329	13.421	4.14972	9.27125	162.724	174.877	80.1494	5.6	72.9687	1.09841
			2776.12	531.125	2245			4600	1806.44	2793.56			3371	1477.25	1893.75			4734	1835.06	2898.94			2987	425.062	2561.94						Image 08	184838	11.1164	4.25532	6.86105	137.852	148.534	84.0172	2.5	33.4042	2.51517
			2607.06	360.062	2247			4423	1629.19	2793.81			3066	1146.19	1919.81			4120	1202.25	2917.75			3770	1190.38	2579.62						Image 09	191916	11.9861	4.2766	7.70951	151.619	160.956	87.2345	3.5	46.9998	1.85606
			3155	903.812	2251.19			4882	2085.81	2796.19			2990	1067.5	1922.5			4525	1516.06	3008.94			3637	1001.69	2635.31						Image 10	177544	11.9182	4.27699	7.64125	150.671	160.059	80.7017	3.7	49.6901	1.6241
			4451	2189.25	2261.75			4489	1691.44	2797.56			3458	1517.94	1940.06			4613	1530.06	3082.94			3536	875.688	2660.31						Image 11	200944	11.6753	4.40707	7.26821	155.61	161.565	91.3383	3.4	47.0499	1.94131
			3423.94	1145.94	2278			5063	2164.44	2898.56			3710	1768.75	1941.25			4738	1644	3094			3269	575.875	2693.12						Image 12	146519	11.7045	4.8569	6.84765	186.762	178.502	66.5996	2.1	32.0264	2.07952
			3656	1344	2312			4625	1676.88	2948.12			4261	2315.12	1945.88			4885	1689.31	3195.69			3247	517.438	2729.56						Image 13	148294	11.434	4.12697	7.30703	134.48	148.17	67.4062	3.8	49.243	1.36885
			3283.69	952.688	2331			4517	1550	2967			2648	695.688	1952.31			4355	1144.69	3210.31			3821	1055.75	2765.25						Image 14	268653	10.9761	4.26755	6.70859	136.582	147.081	122.115	2.4	32.1602	3.79708
			3625	1242.19	2382.81			4772	1755.75	3016.25			3009	1040.12	1968.88			5101	1714.38	3386.62			3792	1015.44	2776.56						Image 15	238156	10.8173	4.6068	6.21052	154.631	156.476	108.253	2.3	33.2703	3.25373
			3446.81	1062.81	2384			4484	1459.44	3024.56			2932	960.25	1971.75			5561	2149	3412			3851	1028.94	2822.06						Image 16	240777	10.8929	4.28053	6.61236	136.155	146.41	109.444	1.7	22.8494	4.78979
			3170	771.5	2398.5			4552	1440.56	3111.44			3357	1385.19	1971.81			5561	2149	3412			4097	1271.69	2825.31						Image 17	357531	11.3741	4.496	6.87808	156.703	160.573	162.514	4.6	64.9402	2.50252
			3205.81	803.812	2402			5054	1869.69	3184.31			3203	1227.62	1975.38			5320	1835.06	3484.94			3051	206.625	2844.38						AVG	253267	11.5839	4.40747	7.17648	154.388	160.238	115.121	3.30588	45.8169	2.74009
			3285.75	882.75	2403			4822	1614.62	3207.38			3987	1983.44	2003.56			5968	2391.5	3576.5			4056	1201.75	2854.25						STD	88772.1	0.712151	0.24375	0.786665	17.709	11.9791	40.351	1.20285	17.483	1.11202
			3660	1245.31	2414.69			4808	1562	3246			2441	426.938	2014.06			4428	843.938	3584.06			3696	779.25	2916.75
			2765.75	336.75	2429			4711	1449.12	3261.88			3276	1260.06	2015.94			4731	1131.94	3599.06			3590	584.125	3005.88					rga4Δ +HU		NdBdInt	L	D	L-D	V	S	Node number	BB length	BB surface area	Node surface density
			2832.62	388.625	2444			4775	1509.19	3265.81			2746	728.5	2017.5			5966	2225.38	3740.62			3590	584.125	3005.88						Image 01	492124	13.245	4.82513	8.41984	212.673	200.673	246.062	5.2	78.7847	3.12322
			3223.62	753.625	2470			4508	1221.94	3286.06			3157	1136.25	2020.75			5983	2147.44	3835.56			3630	620.938	3009.06						Image 02	478605	17.2614	4.46298	12.7985	246.635	241.897	239.302	6.2	86.8852	2.75423
			3712.12	1227.12	2485			5401	2040.69	3360.31			3575	1530.81	2044.19			5510	1657.5	3852.5			3605	558.5	3046.5						Image 03	346832	14.3125	4.55672	9.75574	208.529	204.784	173.416	4.9	70.1097	2.47349
			3129	636.125	2492.88			4780	1417.88	3362.12			3041	992.812	2048.19			6107	2206.38	3900.62			3750	697.562	3052.44						Image 04	348324	14.0124	4.0712	9.94121	164.66	179.128	174.162	4.4	56.2477	3.09635
			3533.19	1038.19	2495			5494	2110.25	3383.75			3300	1248.38	2051.62			5797	1788.69	4008.31			3600	516.75	3083.25						Image 05	392534	16.2092	4.37856	11.8306	221.98	222.855	196.267	5.9	81.1172	2.41955
			3285.19	766.188	2519			5167	1694.75	3472.25			3853	1799.56	2053.44			6112	2022.25	4089.75			3837	740.312	3096.69						Image 06	625662	17.8114	4.38547	13.426	246.836	245.27	312.831	3.4	46.8192	6.68167
			3558.19	1038.19	2520			5406	1908.5	3497.5			3542	1472.88	2069.12			5815	1681.25	4133.75			3642	518.312	3123.69						Image 07	584522	19.0847	4.60242	14.4823	291.833	275.805	292.261	4.1	59.2516	4.93255
			3063	538.5	2524.5			5173	1636.5	3536.5			2313	227.625	2085.38			5627	1387.81	4239.19			3996	829	3167						Image 08	319710	20.343	4.41222	15.9308	288.408	281.839	159.855	7.35	101.83	1.56983
			3444.25	914.25	2530			5534	1993.62	3540.38			3125	1031.25	2093.75			6550	2239.69	4310.31			3767	518.312	3248.69						Image 09	379098	17.2711	4.41222	12.8589	241.463	239.28	189.549	4.2	58.1883	3.25751
			3117	568.625	2548.38			4796	1221.94	3574.06			3250	1143.88	2106.12			5844	1502.88	4341.12			4162	911.438	3250.56						Image 10	710695	17.3641	4.16589	13.1982	217.64	227.138	355.347	5.9	77.1773	4.6043
			3210	647.125	2562.88			4991	1402.75	3588.25			2841	728.5	2112.5			6760	1844.56	4915.44			4630	1301.62	3328.38						Image 11	630062	20.1344	4.0922	16.0422	246.749	258.717	315.031	6.9	88.6617	3.55318
			3594.19	1004.19	2590			4880	1281.81	3598.19			3156	1038.44	2117.56			5540	559.438	4980.56			3942	575.875	3366.12						Image 12	624356	15.4766	4.40154	11.075	213.058	213.899	312.178	4.6	63.5758	4.91033
			3329	710.25	2618.75			5131	1516.12	3614.88			3159	1033.06	2125.94								4277	845.75	3431.25						Image 13	758468	18.9341	4.30578	14.6283	254.672	255.991	379.234	5.1	68.9528	5.49991
			3700.38	1080.38	2620			4995	1351.5	3643.5			3031	904	2127								4238	655.5	3582.5						Image 14	602218	15.5425	4.02155	11.5209	180.304	196.265	301.109	5.7	71.9778	4.18336
			3776	1146.06	2629.94			5042	1381.75	3660.25			3294	1146.19	2147.81								3827	239.312	3587.69						Image 15	494178	13.6919	4.23572	9.45613	172.95	182.104	247.089	4.8	63.8408	3.8704
			3896	1262.75	2633.25			5366	1467.62	3898.38			2992	842.125	2149.88								4114	491.688	3622.31						Image 16	774413	17.9251	4.32701	13.5981	242.256	243.544	387.207	6.4	86.9555	4.45293
			3555	901.812	2653.19			5830	1805.06	4024.94			3892	1727.56	2164.44								4503	859.875	3643.12						Image 17	746291	18.4149	4.29484	14.1201	245.915	248.339	373.145	5	67.4289	5.53391
			3600	942.875	2657.12			5697	1483.25	4213.75			2789	624.188	2164.81								4202	431.312	3770.69						Image 18	965079	19.6925	4.27109	15.4214	261.612	264.101	482.539	6.02	80.7356	5.97679
			2813	148.125	2664.88			6400	2110.12	4289.88			3528	1357.06	2170.94								4356	579.625	3776.38						AVG	570732	17.0404	4.3457	12.6947	231.01	232.313	285.366	5.33722	72.6966	4.04964
			3719.38	1018.38	2701			5668	1335.38	4332.62			2672	496.25	2175.75								3960	177.5	3782.5						STD	179027	2.2539	0.198209	2.29386	35.5289	30.8385	89.5133	1.03657	13.8117	1.38476
			3924	1215.12	2708.88			5515	1084.38	4430.62			3510	1333.62	2176.38								4502	620.938	3881.06
			3185	410.562	2774.44			6274	1754.69	4519.31			2658	460.438	2197.56								4024	95.3125	3928.69
			3071	263.062	2807.94			6274	1754.69	4519.31			2793	595.375	2197.62								5043	973.938	4069.06
			3133	288.812	2844.19			6620	2030.88	4589.12			3313	1109.38	2203.62								4679	566	4113
			4457.88	1580.88	2877			6133	1470.69	4662.31			3381	1175.75	2205.25								4733	425.375	4307.62
			4119.12	1227.12	2892			6101	1417.88	4683.12			3112	904	2208								5361	874.875	4486.12
			3896	1001.06	2894.94			6130	1334.44	4795.56			4421	2208.19	2212.81								5380	697.562	4682.44
			3695	796.062	2898.94								2851	624.188	2226.81
			4052	1146.06	2905.94								3591	1357.06	2233.94
			3919	1001.06	2917.94								4658	2401.88	2256.12
			3774	840.812	2933.19								3553	1282.12	2270.88
			3345.12	407.125	2938								4466	2171.25	2294.75
			3988	1047.94	2940.06								3321	1013.88	2307.12
			3995.94	1027.94	2968								3391	1080.12	2310.88
			3267	281.438	2985.56								3746	1427.38	2318.62
			3750	753.625	2996.38								4260	1930.69	2329.31
			3587.31	588.312	2999								3193	842.25	2350.75
			4046	1043.88	3002.12								4405	2036.19	2368.81
			4082	1047.94	3034.06								3769	1394.19	2374.81
			3998.12	961.125	3037								3875	1489.19	2385.81
			4213	1128.31	3084.69								3115	725.438	2389.56
			4476.06	1334.06	3142								3583	1182.81	2400.19
			3562.25	402.25	3160								3385	984.625	2400.38
			3443	207.125	3235.88								3507	1097.38	2409.62
			3666	410.562	3255.44								3616	1205.94	2410.06
			3844	560.562	3283.44								3558	1140.5	2417.5
			4642.06	1334.06	3308								3323	904	2419
			3539	204.625	3334.38								3787	1357.06	2429.94
			4562	1227.31	3334.69								3647	1182.81	2464.19
			4685	1347.75	3337.25								3446	958.188	2487.81
			3965	572.75	3392.25								3856	1363.81	2492.19
			4246.56	817.562	3429								3111	614.562	2496.44
			4246.56	817.562	3429								3513	1013.88	2499.12
			4172	644.562	3527.44								4434	1919.88	2514.12
			4814	1262.75	3551.25								3573	1058.44	2514.56
			4621.44	1054.44	3567								3144	614.562	2529.44
			4866	1242.19	3623.81								4671	2131.19	2539.81
			4908.12	1221.12	3687								3838	1294.88	2543.12
			4503.62	753.625	3750								4711	2160.69	2550.31
			5268	1348.12	3919.88								3550	994.625	2555.38
			4128	202.375	3925.62								3500	918.312	2581.69
			5184	1125.62	4058.38								4472	1889.06	2582.94
			4495	281.438	4213.56								3644	1057.19	2586.81
			5136.25	914.25	4222								3581	983	2598
			4882	364.375	4517.62								3265	623.188	2641.81
													3282	623.188	2658.81
													4278	1615.69	2662.31
													4001	1323.19	2677.81
													3560	865.312	2694.69
													3544	842.125	2701.88
													4876	2171.44	2704.56
													3069	360.312	2708.69
													4548	1800.5	2747.5
													3817	1067.5	2749.5
													4533	1781.38	2751.62
													3452	696.5	2755.5
													3850	1067.5	2782.5
													3810	980.25	2829.75
													4933	2094.94	2838.06
													4279	1426.44	2852.56
													4206	1351.81	2854.19
													3967	1109.38	2857.62
													4426	1565.69	2860.31
													4518	1651.12	2866.88
													4438	1548.81	2889.19
													3988	1088.56	2899.44
													3945	1039.69	2905.31
													4517	1607.62	2909.38
													5301	2377.88	2923.12
													4835	1909.19	2925.81
													3966	1039.69	2926.31
													4062	1116.69	2945.31
													4036	1088.56	2947.44
													3588	624.188	2963.81
													3617	623.188	2993.81
													3783	785.438	2997.56
													4935	1932.25	3002.75
													5603	2600	3003
													3787	775.5	3011.5
													3842	791.688	3050.31
													5363	2295.94	3067.06
													3891	816.375	3074.62
													4096	994.375	3101.62
													4029	924.25	3104.75
													3818	686.625	3131.38
													4366	1223.94	3142.06
													3726	557.438	3168.56
													3760	566.75	3193.25
													5311	2110	3201
													3600	392.5	3207.5
													4844	1624.75	3219.25
													4638	1404.81	3233.19
													3860	624.188	3235.81
													4323	1057.19	3265.81
													4110	842.125	3267.88
													4773	1503.25	3269.75
													5134	1841.62	3292.38
													5000	1689.81	3310.19
													3887	541.812	3345.19
													4606	1260.06	3345.94
													3976	590.75	3385.25
													4650	1248.38	3401.62
													4073	649.375	3423.62
													5977	2527.94	3449.06
													4692	1242	3450
													4738	1254.69	3483.31
													4308	821.188	3486.81
													4142	649.375	3492.62
													3927	426.938	3500.06
													4186	684.875	3501.12
													4591	1080.12	3510.88
													4651	1114	3537
													4197	649.375	3547.62
													5340	1785.62	3554.38
													4571	1013.88	3557.12
													3974	412.5	3561.5
													5531	1967.44	3563.56
													4039	412.5	3626.5
													4430	788.688	3641.31
													4574	904	3670
													5242	1556.19	3685.81
													4936	1244.5	3691.5
													6083	2388	3695
													4766	1031.25	3734.75
													5171	1427.38	3743.62
													5982	2232.06	3749.94
													5255	1503.25	3751.75
													4836	1057.19	3778.81
													5104	1299.62	3804.38
													5450	1639.38	3810.62
													4698	862.688	3835.31
													4620	782.562	3837.44
													5219	1374.81	3844.19
													4822	972.812	3849.19
													5029	1141.56	3887.44
													4954	1062.62	3891.38
													4345	392.5	3952.5
													4712	728.5	3983.5
													4982	980.25	4001.75
													5913	1821.19	4091.81
													5383	1278	4105
													5687	1580.88	4106.12
													5453	1333.62	4119.38
													4432	308.125	4123.88
													5671	1427.38	4243.62
													6067	1819.06	4247.94
													5212	937.375	4274.62
													4726	426.938	4299.06
													5746	1445.69	4300.31
													5459	1080.12	4378.88
													6062	1639.38	4422.62
													5271	842.125	4428.88
													6669	2232.06	4436.94
													5923	1445.69	4477.31
													5940	1336.81	4603.19
													5937	1333.62	4603.38
													6160	1534.62	4625.38
													5849	1113.75	4735.25
													6574	1800.5	4773.5
													6102	1282.12	4819.88
													5937	992.375	4944.62
													5742	785.438	4956.56
													6145	1178.94	4966.06
													6427	1445.69	4981.31
