# Supplementary material for: The number of cytokinesis nodes in mitotic fission yeast scales with cell size
Source: eLife. 2022 Sep 12;11:e76249. doi: 10.7554/eLife.76249 (PMC9467510; doi:10.7554/eLife.76249)
Supplement: Figure 4—source data 1. [file elife-76249-fig4-data1.xlsx]

## Sheet: Sheet1
	Figure 4C
		Average intensity on the plasma membrane of broad band (A.U.)
		WT			wee1-50			cdc25-22			rga4Δ			rga2Δ			Average intensity on the plasma membrane of broad band (A.U.)
		Cell length	Pom1-mEGFP		Cell length	Pom1-mEGFP		Cell length	Pom1-mEGFP		Cell length	Pom1-mEGFP		Cell length	Pom1-mEGFP		Strains	Mean_cell length	SD	Pom1-mEGFP	SD
		13.4	0.137506		8	0.221889		30.4	0.198027		14.4	0.170347		14.4	0.308032		WT	14.03	0.53	0.249548	0.095829
		13.4	0.205802		8	0.077281		30.4	0.202277		14.4	0.15501		14.4	0.424095		wee1-50	7.2	0.83	0.24822	0.084916
		13.1	0.164192		7.8	0.151045		30.4	0.241063		13.8	0.271814		13.8	0.371847		cdc25-22_30um	32	2.46	0.207877	0.035961
		13.1	0.15225		7.8	0.245517		30.4	0.218624		13.8	0.226		13.8	0.29762		cdc25-22_40um	41.05	1.52	0.225202	0.059558
		14	0.163892		6.1	0.237852		29.8	0.171817		13.7	0.252876		13.7	0.260303		rga4Δ	12.38	0.58	0.205556	0.057133
		14	0.157948		6.1	0.204299		29.8	0.188044		13.7	0.224363		13.7	0.280071		rga2Δ	14.34	1.06	0.327457	0.060406
		14.4	0.264127		7.2	0.418054		31.2	0.253392		14.4	0.205117		14.4	0.396203
		14.4	0.454759		7.2	0.337297		31.2	0.195826		14.4	0.177575		14.4	0.380365
		14.3	0.269662		6	0.257678		34.2	0.173845		14.9	0.176546		14.9	0.34334
		14.3	0.229697		6	0.20737		34.2	0.147814		14.9	0.19752		14.9	0.372648
		13.7	0.247792		7.6	0.302286		35.9	0.264705		16.6	0.276397		16.6	0.272831
		13.7	0.347705		7.6	0.295205		35.9	0.239095		16.6	0.158103		16.6	0.335
		14.1	0.319255		7.8	0.194811		41.5	0.275549		13.5	0.161376		13.5	0.440787
		14.1	0.462318		7.8	0.3245		41.5	0.317798		13.5	0.176131		13.5	0.310141
		14.7	0.228058					42.9	0.244562		13	0.120759		13	0.230138
		14.7	0.174					42.9	0.308364		13	0.161691		13	0.263989
		14.6	0.254					45	0.282464		14.7	0.356204		14.7	0.335326
		14.6	0.258906					45	0.350909		14.7	0.232183		14.7	0.271482
								40.4	0.268713
								40.4	0.276058
								43.8	0.215764
								43.8	0.218269
								40.9	0.14503
								40.9	0.215661
								38.4	0.214619
								38.4	0.181398
								41.6	0.143332
								41.6	0.131542
								40.8	0.159229
								40.8	0.194463
								40.7	0.205003
								40.8	0.226784
								40.7	0.196794
								40.7	0.182144
	Figure 4D
		Average intensity on the plasma membrane of broad band (a. u.)															Average intensity on the plasma membrane of broad band (a. u.)
		WT			wee1-50			cdc25-22			rga4Δ			rga2Δ			Strains	Blt1-mCherry	SD	Pom1-mEGFP	SD
		Blt1-mCherry	Pom1-mEGFP		Blt1-mCherry	Pom1-mEGFP		Blt1-mCherry	Pom1-mEGFP		Blt1-mCherry	Pom1-mEGFP		Blt1-mCherry	Pom1-mEGFP		WT	0.433809	0.201749	0.249548	0.095829
		0.434506	0.137506		0.194296	0.221889		0.602656	0.275549		0.200257	0.170347		0.518628	0.308032		cdc25-22_30um	0.43643	0.12333	0.225202	0.059558
		0.555116	0.205802		0.231263	0.077281		0.564423	0.317798		0.192698	0.15501		0.346464	0.424095		cdc25-22_40um	0.445741	0.066304	0.207877	0.035961
		0.7	0.164192		0.194576	0.151045		0.461813	0.244562		0.210826	0.271814		0.259208	0.371847		wee1-50_at 36	0.198405	0.03883	0.24822	0.084916
		1.03741	0.15225		0.179533	0.245517		0.453008	0.308364		0.167374	0.226		0.394877	0.29762		rga4Δ	0.170413	0.047356	0.205556	0.057133
		0.354189	0.163892		0.164864	0.237852		0.308515	0.282464		0.211773	0.252876		0.458165	0.260303		rga2Δ	0.534041	0.163505	0.327457	0.060406
		0.297818	0.157948		0.117966	0.204299		0.413147	0.350909		0.2063	0.224363		0.496653	0.280071
		0.236873	0.264127		0.234689	0.418054		0.368292	0.268713		0.192389	0.205117		0.608237	0.396203
		0.602463	0.454759		0.141338	0.337297		0.334675	0.276058		0.183369	0.177575		0.96646	0.380365
		0.412815	0.269662		0.181126	0.257678		0.356759	0.215764		0.195778	0.176546		0.54941	0.34334
		0.558167	0.229697		0.20538	0.20737		0.32406	0.218269		0.260441	0.19752		0.357176	0.372648
		0.302162	0.247792		0.224083	0.302286		0.433688	0.14503		0.160356	0.276397		0.552492	0.272831
		0.204455	0.347705		0.224769	0.295205		0.305277	0.215661		0.160485	0.158103		0.565529	0.335
		0.327007	0.319255		0.257396	0.194811		0.475921	0.214619		0.077048	0.161376		0.423913	0.440787
		0.358439	0.462318		0.226394	0.3245		0.290611	0.181398		0.071804	0.176131		0.551579	0.310141
		0.287519	0.228058					0.459189	0.143332		0.157405	0.120759		0.556277	0.230138
		0.273649	0.174					0.548956	0.131542		0.129181	0.161691		0.569556	0.263989
		0.431635	0.254					0.686606	0.159229		0.123842	0.356204		0.651965	0.335326
		0.434349	0.258906					0.654057	0.194463		0.1661	0.232183		0.786158	0.271482
								0.50936	0.205003
								0.495639	0.226784
								0.300264	0.196794
								0.254546	0.182144
								0.36179	0.198027
								0.37607	0.202277
								0.515205	0.241063
								0.551385	0.218624
								0.37973	0.171817
								0.504337	0.188044
								0.432818	0.253392
								0.535342	0.195826
								0.394018	0.173845
								0.40722	0.147814
								0.458224	0.264705
								0.432751	0.239095
