# Supplementary material for: The number of cytokinesis nodes in mitotic fission yeast scales with cell size
Source: eLife. 2022 Sep 12;11:e76249. doi: 10.7554/eLife.76249 (PMC9467510; doi:10.7554/eLife.76249)
Supplement: Figure 5—source data 1. [file elife-76249-fig5-data1.xlsx]

## Sheet: Sheet1
	Figure 5A							Figure 5B				Figure 5C				Figure 5D				Figure 5E							Figure 5F				Figure 5G				Figure 5H
		mEGFP-Pom1 Intensity per pixel (a.u.)																				Unitary node intensity (a. u. )
		WT	Pnmt81-mEGFP Pom1																		WT	24h +T	12h	25h	40h
			24h +T	12h	25 h	40h			mEGFP-Pom1 intensity per pixel in whole cell	mEGFP-Pom1 intesity in the cortex of broad band			mEGFP Pom1 intensity per pixel in whole cell	Cell length			Average Blt1-mCherry intensity in broad band (a.u.)	Average mEGFP-Pom1 intensity over whole cells (a.u.)										Average mEGFP-Pom1 intensity over whole cells (a. u. )	Broad band Width (µm)			Average mEGFP-Pom1 intensity over whole cells (a. u. )	Node number			Average mEGFP-Pom1 intensity along plasma membrane in broad band (a. u. )	Ratio of width of broad band of nodes to the cell length
		7.55712	2.96689	2.84161	17.8219	36.7273			3.70583	0.00978			2.84161	10.4652			2.84161	109.646			4919.9	2958.69	3189.19	1854.56	2214.81			2.84161	4.34			2.84161	262.385			0.00978	0.519319
		7.72947	2.01954	3.70583	6.4258	20.5792			3.70583	0.1202			3.70583	10.5908			3.70583	78.3634			5078.21	1127.5	2589.62	1011.88	1455.25			3.70583	5.5			3.70583	281.828			0.1202	0.519319
		8.14837	5.76344	4.25125	15.2025	30.4765			4.25125	0.04481			4.25125	12.104			4.25125	79.564			4717.66	3066.12	2390.81	2350.69	2358.38			4.25125	5.2			4.25125	229.487			0.04481	0.429611
		7.69302	9.42997	14.5886	2.11553	40.4903			4.25125	0.21065			14.5886	11.845			14.5886	53.4446			2273.81	1800	2903.81	1690.5	1887.75			14.5886	5.9			14.5886	200.966			0.21065	0.429611
		8.17704	12.0884	17.3087	15.083	20.9974			14.5886	0.43115			17.3087	11.5638			17.3087	79.8229			851.673	1180.44	1678.81	1909.62	1922.94			17.3087	4.5			9.9858	234.967			0.43115	0.498099
		6.1722	7.84156	9.9858	10.866	30.0973			14.5886	0.84585			9.9858	11.0208			9.9858	75.9775			1450.07	1493.94	2234.88	2289	2448.94			9.9858	4.8			8.57869	230.482			0.84585	0.498099
		6.43647	7.78177	8.57869	16.805	32.8321			17.3087	0.72267			8.57869	10.553			8.57869	88.6762			1825.68	3061.06	2191.88	1358.62	1838.69			8.57869	4.6			6.69119	221.23			0.72267	0.389145
		10.2403	6.56596	6.69119	13.1401				17.3087	0.80972			6.69119	11.6204			6.69119	64.4553			865.254	3161.06	304.375	3053.69	2244.56			6.69119	4.8			9.49872	245.193			0.80972	0.389145
		9.86093	10.1906	9.49872	18.3746				9.9858	0.34695			9.49872	12.2315			9.49872	76.0767			1142.62	2378.06	3344.88	2321.88	2367.69			9.49872	5.5			2.96689	239.078			0.34695	0.435541
		10.0304			11.0899				9.9858	0.47831			2.96689	11.9513			2.96689	78.4523			1717.03	2333.25	1543.69	1688	1974.69			2.96689	4.1			2.01954	239.691			0.47831	0.435541
					11.436				8.57869	0.84646			2.01954	12.603			2.01954	59.4863			2360.01	2202.19	1947.62	1317.62	1518.25			2.01954	5.3			5.76344	256.274			0.84646	0.435894
									8.57869	1.14431			5.76344	11.2786			5.76344	83.1322			2580.18	1887.69	2662.56	2221.5	1308.38			5.76344	4.1			9.42997	215.097			1.14431	0.435894
									6.69119	0.25331			9.42997	13.0497			9.42997	73.612			1675.21	1567.31	2508.12	1432.5	2424.38			9.42997	4.8			12.0884	171.605			0.25331	0.413065
									9.49872	0.40197			12.0884	12.8289			12.0884	61.236			3299.99	2463.69	1734.69	1886.38	2138.38			12.0884	3.9			7.84156	204.8			0.40197	0.44966
									9.49872	0.35869			7.84156	10.4583			7.84156	68.1534			2257.1	2461.69	1495.88	2126.88	1863.44			7.84156	5.4			6.566	180.796			0.35869	0.44966
									2.01954	0.40202			6.566	10.6613			6.566	38.4539			2443.65	1406.69	2057.19	2847.38	3038			6.566	4			10.1906	206.582			0.40202	0.420534
									5.76344	1.43449			10.1906	12.3753			10.1906	76.8024			1142.06	1710.88	1134.69	1189.12	1540.31			10.1906	4.6			17.619	228.311			1.43449	0.363521
									5.76344	1.88539			17.619	15.2			17.619	79.0108			1816.1	2289.62	2260.44	2036.94	2590			17.619	4.8			24.9182	247.931			1.88539	0.363521
									9.3524	1.52047			24.9182	13.3			24.9182	75.817			3026.11	1444.62	1652.56	953.688	1694			24.9182	5.2			29.192	176.402			1.52047	0.376435
									9.3524	1.28535			29.192	13.5			29.192	70.0573			3300.96	1408.19	1121.81	2437.62	1449.06			29.192	4.2			16.805	167.987			1.28535	0.376435
									12.0884	2.27472			16.805	15.3			16.805	56.5223			3604.36	2966.69	1636.31	1309.31	892.438			16.805	4.7			13.1401	138.4			2.27472	0.304002
									12.0884	2.22983			13.1401	12.1			13.1401	49.2274			3928.52	3109.62	2608.69	947.25	2352.69			13.1401	4.5			18.3746	173.407			2.22983	0.304002
									7.84156	0.2935			18.3746	16.92			18.3746	48.4363			3642.18	2368.69	1621.62	2333.25	1817.69			18.3746	4.7			11.0899	171.855			0.2935	0.516337
									7.78177	1.43253			11.0899	17.3			11.0899	50.7714			2908.59	1358	1357.62	2616.19	2180.69			11.0899	4.3			11.436	194.312			0.42982	0.37519
									7.78177	1.41552			11.436	18			11.436	60.5857			2395.27	2234.31	1761.19	1081.38	1648.19			11.436	4.4			36.7273	269.874			0.03887	0
									6.566	0.42982			36.7273	16.5315			36.7273	63.164			2162.9	2316.31	1711	1208.94	1625.44			36.7273	3.9			20.5792	386.789			1.21193	0
									11.4329	0.03887			20.5792	18.3226			20.5792	134.767			428.809	3381	1678.56	1998.81	3655.25			20.5792	3.1			30.4765	408.804			1.17601	0.371707
									11.4329	1.21193			30.4765	17.9447			30.4765	127.219			916.811	1895.88	1396.19	1576.69	3196.12			30.4765	4.3			40.4903	345.948			0.33484	0.371707
									10.1906	1.17601			40.4903	16.6773			40.4903	131.608			1412.76	2237.31	3680.88	2064.44	2452.56			40.4903	3.4			20.9974	413.751			1.67843	0.314005
									10.1906	0.33484			20.9974	17.2651			20.9974	121.059			2546.3	2520.94	1488.44	2624.44	2133.69			20.9974	4.2			30.0973	374.185			2.21521	0.314005
									17.619	1.67843			30.0973	18.7296			30.0973	126.067			1855.15	2787	2581.88	1983.94	2830.62			30.0973	5.2			32.8321	291.884			2.01332	0.389047
									17.619	2.21521			32.8321	17.4104			32.8321	92.4497			2890.35	2114.56	2891.06	1777.69	2302.62			32.8321	6.1							1.64671	0.389047
									24.9182	2.01332											1835.83	1374.06	2334.06	2572.88	1615.19											4.10803	0.304193
									24.9182	1.64671											1913.57	3248.25	2241.44	1706.88	3560.19											2.71899	0.304193
									29.192	4.10803											1303.9	2607.81	2752	1526.88	2408.81											2.45289	0.306154
									29.192	2.71899											1199.81	2798.62	1869.25	1337.94	1195.56											1.9251	0.306154
									16.805	2.45289											1706.62	2837.25	2935.06	1303.19	1188.56											1.27212	0.370506
									16.805	1.9251											1809.48	2360.25	1396.56	2047.12	2678.19											0.94827	0.370506
									13.1401	1.27212											2801.89	743.25	853.188	2284.56	2916											2.89233	0.288718
									13.1401	0.94827											1502.09	2551.06	2685.25	1242.06	1044.5											2.01355	0.288718
									18.3746	2.89233											3130.14	2918.06	2207.38	2804.62	2812.44											0.81345	0.245159
									18.3746	2.01355											2993.36	1909.75	1212.69	3108.81	2251.62											0.92787	0.245159
									11.0899	0.81345											1185.77	2212.06	960.938	2630.81	2467.81											1.02027	0.244336
									11.0899	0.92787											1527.71	3001.81	1530	2742.12	2585.75											1.29034	0.244336
									11.436	1.02027											2642.66	2105.88	2808	1433.31	2370.81											3.50884	0.235913
									11.436	1.29034											2138.46	2639.06	2018	3059.19	2172.69											2.84043	0.235913
									36.7273	3.50884											1985.94	2306.62	1514	2611.62	2018.12											0.87788	0.292511
									36.7273	2.84043											1960.41	2462.31	901.438	1514.62	2167.12											1.2597	0.292511
									8.95707	0.87788											1087.42	1394.06	2602.69	2102.62	2366.19											1.71695	0.16919
									8.95707	1.2597											1133.34	2083.31	1634.94	1920.5	1684.81											1.86826	0.16919
									20.5792	1.71695											939.976	1875.62	2199.06	2127.38	1258.12											3.22242	0.239624
									20.5792	1.86826											1386.26	2735.44	2536.75	1580.56	3056.25											3.25717	0.239624
									30.4765	3.22242											1901.22	1811	2238.75	3065.56	2655.81											3.44548	0.20387
									30.4765	3.25717											1988.14	1245.31	2227.19	3073.56	2540.81											4.50321	0.20387
									40.4903	3.44548											1614.02	2079.06	2761.5	1268.31	1562											2.20551	0.243265
									40.4903	4.50321											712.221	1678.62	1555.5	1512.31	2107.38											1.90626	0.243265
									20.9974	2.20551											924.499	2319.62	1843.5	1692.31	2589.62											3.35512	0.277635
									20.9974	1.90626											1516.9	2747.62	2846.5	1971	1644											2.33831	0.277635
									30.0973	3.35512											1194.64	2373.12	1581.25	1421.69	2126.06											4.13424	0.350366
									30.0973	2.33831											2498.28	2224.38	80.375	2109.56	1869.06											3.95904	0.350366
									32.8321	4.13424											2262.84	2093.69	1524.12	1600.25	2910.06
									32.8321	3.95904											1194.64	1940.06	2152.44	2617	2660.31
																					1440.94	1301.88	1355.94	2601	2250.31
																					1474.57	2484.88	2472.94	1070.38	2357.12
																					1925.57	1785.06	2296.25	2137.62	2446.31
																					2940.83	1478.06	2178.69	1358.94	2362.12
																					3048.09	1950.06	3430.06	2775.81	2639.88
																					2839.81	2563.06	2262.88	2442.81	3022.31
																					2875.89	2091.62	2790.88	2529.81	1039.81
																					3547.93	2193.69	2821.06	1880.69	1749.81
																					3365.13	2863.06	2692.5	1649	3038.75
																					1865.81	2025.38	1703.06	1668.94	2896.5
																					1143.8	1556.12	3246.62	1977.12	2276.19
																					2400.91	1319.31	1742.62	2131.81	2686.75
																					2293.13	3063.81	4149.06	1593.88	2355.75
																					1650.25	2580.88	2417.94	1679.44	2108.75
																					1359.97	2795.31	3195.81	1869.06
																					2043.85	2332.31	3107.06	1758.75
																					1297.91	2743.31	1826.69	1466.75
																					2632.61	2510.81	4238.81	2542.19
																					2356.68	2551.88	2803.19	2531.44
																					1328.81	1454.38	1363.81	1347.31
																					4869.52	2905.81	3315.81
																					1976.25	2040.81	2352.81
																					1692.33	2423.88	2657.62
																					3072.59	2877.81	2186.62
																					3208.71	1666.75	1441.62
																					1708.06	2131.5	1969.44
																					3102.01	2203.19	3019.44
																					1923.31	2193	3177.81
																					2262.99	2931.31	2433.62
																					1525.2	1875.88	2343.38
																					1419.42	2371.88	2090.06
																					1142.36	1401.31	2636.06
																					1157.17	1315.19	2034.94
																					2740.64	1975.12	2715.88
																					1862.12	1330.06	2152.31
																					3351.24	1357.88	2658.5
																					1332.6	2365.75	2409.06
																					1439.87	2896.75	3293.62
																					2877.48	1292.75	1744.81
																					913.275	1254.44	2161.94
																					1084.96	1440	2077.88
																					750.249	2961.56
																					1680.08	2725.56
																					2961.43	2769.25
																					1364.07	1701.94
																					3497.45	3108.56
																					3025.7	2366.25
																					2391.02
																					2659.98
																					2891.88
																					2322.7
																					2322.39
																					2104.27
																					2943.54
																					2545.59
																					2364.21
																					950.534
																					1405.63
																					1760.69
																					1296.01
																					1293.19
																					974.775
																					1887.79
																					1477.43
																					1141.54
																					1446.99
																					1249.37
																					1872.32
																					765.009
																					1535.91
																					2565.83
																					2329.72
																					1255.37
																					1678.8
																					1305.64
																					1975.59
																					580.048
																					1723.85
																					1776.43
																					3231.57
																					500.507
																					1039.81
																					1041.45
																					1396.51
																					1092.29
																					1518.08
																					1862.32
																					538.33
																					1133.29
																					2205.95
																					1413.12
																					1767.66
																					2092.38
																					2526.98
																					1626.16
																					2366.32
																					2138.87
																					1427.06
																					2259.3
																					2323.37
																					1273.31
																					3160.49
																					2851.5
																					3622.5
																					1493.78
																					1755.11
																					2190.43
																					2218.66
																					2240.34
																					1423.62
																					2749.05
																					3185.39
																					1820.86
																					2115.09
																					2384.25
																					2313.43
																					2667.92
																					2271.61
																					1551.03
																					2521.14
																					2236.91
																					1953.29
																					973.955
																					914.249
																					1599.87
																					1905.73
																					3406.02
																					1533.91
																					1769.61
																					1990.19
																					3025.85
																					998.247
																					998.247
																					1154.61
																					2194.01
																					2563.63
																					1480.97
																					1587.47
																					3324.23
																					2212.41
																					2967.73
																					1760.08
																					2700.41
																					4004.37
																					1486.15
																					3832.78
																					3110.82
																					4517.69
																					2436.27
																					2064.71
																					1210.32
																					1358.07
																					2532.31
																					2567.88
																					1628.01
																					1905.94
																					1082.91
																					2085.77
																					3621.27
																					1534.89
																					1339.42
																					1756.8
																					1953.6
																					4895.76
																					3341.7
																					2423.1
																					2525.96
																					2581.92
																					3171.91
																					2217.79
																					1367.81
																					1898.35
																					1376.27
																					1692.02
																					375.099
																					1111.25
																					1282.94
																					2122.98
																					1267.92
																					1543.29
																					944.845
																					1646.92
																					1238.1
																					504.095
																					676.244
																					621.663
																					928.342
																					900.104
																					1064.46
																					2475.48
																					1735.38
																					1000.55
																					2550.35
																					1610.74
