# Supplementary material for: The number of cytokinesis nodes in mitotic fission yeast scales with cell size
Source: eLife. 2022 Sep 12;11:e76249. doi: 10.7554/eLife.76249 (PMC9467510; doi:10.7554/eLife.76249)
Supplement: Figure 6—source data 1. [file elife-76249-fig6-data1.xlsx]

## Sheet: Sheet1
	Figure 6A						Figure 6B				Figure 6C				Figure 6D						Figure 6E				Figure 6F
			mEGFP-Cdr2 intensity per pixel (a.u.)														Unitary node intensity (a.u.)
		WT	Pnmt81-mEGFP Cdr2													WT	24h +T	12h	40h
			24h +T	12h	40h			Aveage mEGFP-Cdr2 intensity over whole cells (a.u.)	Cell length (µm)			Aveage mEGFP-Cdr2 intensity over whole cells (a.u.)	Broad band width (µm)			4919.9	864.25	661.375	1434.69			Average mEGFP-Cdr2 intensity over whole cells (a.u.)	Node number			Average mEGFP-Cdr2 intensity over whole cells (a.u.)	Average Blt1-mCherry intensity in broad band (a.u.)
		14.6372	12.44	12.97	60.91			12.97	18.117			12.97	4.38			5078.21	871.062	707.625	857.75			12.44	293.046			12.97	59.98
		13.8549	10.81	21.3	40.1			21.3	17.0057			21.3	5.79			4717.66	923.125	768.625	1548.44			10.81	264.618			21.3	67.43
		16.0573	10.83	20.5	50.99			20.5	17.8731			20.5	5.79			2273.81	1027.81	907.25	2051.88			10.83	269.184			20.5	78.18
		8.22615	7.57	15.65	49.52			15.65	17.4954			15.65	5.6			851.673	1066.75	955.375	2548.19			7.57	259.73			15.65	62.4
		7.66459	9.3	4.93	45.5			4.93	19.9253			4.93	5			1450.07	1151.88	960.062	840.438			9.3	289.053			4.93	77.17
		16.967	9.18	12.7	57.53			12.7	16.9038			12.7	5.04			1825.68	1176.81	968.375	3026.12			9.18	250.487			12.7	90.22
		10.5413	6.44	21.02	36.45			21.02	18.8925			21	6.17			865.254	1259.31	973.062	1222.12			6.44	277.178			21.02	70.59
		10.3046	4.39	18.75	29.48			18.75	18.2642			18.8	6.94			1142.62	1296.38	1004.5	1238.88			4.39	373.277			18.75	70.66
		12.7872	6.24	16.85	30.34			16.85	19.3503			16.85	5.56			1717.03	1383.06	1052.25	1928.88			6.24	264.883			16.85	75.99
		17.2107	9.19		32.84			12.44	17.77			12.44	4.78			2360.01	1420.38	1056.25	1672.19			9.19	359.862			12.44	72.49
		14.3224			44.91			10.81	20.57			10.81	6.61			2580.18	1432.94	1112.38	1814.88			12.97	274.58			10.81	72.37
								10.83	18.91			10.83	5.85			1675.21	1446	1164.62	2868.88			21.3	330.553			10.83	93.85
								7.57	17.52			7.57	7.61			3299.99	1465.69	1172	2150			20.5	282.397			7.57	76.55
								9.3	19.44			9.3	8.88			2257.1	1510.19	1184.25	1346.88			15.65	279.111			9.3	87.99
								9.18	18.52			9.18	6.96			2443.65	1570.06	1202.62	1082.88			4.9	262.919			9.18	86.39
								6.44	18.26			6.44	5.32			1142.06	1578.06	1208.44	2099.19			12.7	338.068			6.44	68.95
								4.39	19.97			4.39	6.47			1816.1	1585.06	1256.56	2275.5			21.02	312.239			4.39	92.55
								6.24	19.26			6.24	4.82			3026.11	1633.44	1278.88	3826.75			18.75	351.301			6.24	77.7
								9.19	19.4015			9.19	4.98			3300.96	1642.12	1282.38	2575.88			16.85	349.76			9.19	69.39
								60.91	15.68			60.91	5.74			3604.36	1649.62	1349.25	2683.69			60.91	346.987			60.91	119.58
								40.1	15.2483			40.1	5.32			3928.52	1650.06	1351.56	1516.25			40.1	398.694			40.1	88.31
								50.99	15.3079			50.99	5.74			3642.18	1674.75	1354.25	1319.75			50.99	425.715			50.99	91.34
								49.52	15.6606			49.52	7.34			2908.59	1690.06	1354.38	1770.19			49.52	408.724			49.52	112.59
								45.5	15.57			45.5	6.48			2395.27	1729.06	1375.25	1766.5			45.5	404.875			45.5	94.96
								57.53	15.46			57.53	5.8			2162.9	1739.81	1379	2626.94			57.53	436.624			57.53	104.52
								30.34	16.78			30.34	6.05			428.809	1747.94	1385.62	1409			30.34	446.485			30.34	100.1
								32.84	17.48			32.84	5.91			916.811	1749.25	1420.81	2568.5			32.84	411.137			32.84	98.96
								44.91	17.49			44.91	5.6			1412.76	1794	1450.56	3359.25			44.91	388.339			44.91	101.98
																2546.3	1802.12	1450.88	1897.75
																1855.15	1803	1459.88	2167.94
																2890.35	1807.88	1462.19	2827.75
																1835.83	1824.06	1470.88	1548.56
																1913.57	1826.5	1474.5	2369
																1303.9	1851.94	1512.25	2606.31
																1199.81	1853.44	1514.62	2332.06
																1706.62	1866.38	1526.62	2881.62
																1809.48	1881.56	1545.56	2284.19
																2801.89	1973.81	1558.5	1357.19
																1502.09	1978.75	1561.5	2533.62
																3130.14	2059.38	1579	3510.56
																2993.36	2096.25	1583.19	3137.44
																1185.77	2097.81	1588.31	1582.19
																1527.71	2117.31	1616.56	3094.94
																2642.66	2119.44	1634.19	2254.44
																2138.46	2119.62	1637.06	1646.62
																1985.94	2124.06	1667.62	1640
																1960.41	2139.5	1681.88	1742
																1087.42	2175	1699.38	2799.94
																1133.34	2185.06	1719	2074.38
																939.976	2235	1741.06	3088.31
																1386.26	2235	1785	2621.56
																1901.22	2247.31	1785.44	2615.94
																1988.14	2281	1793.5	2955.94
																1614.02	2283	1807.12	1840.12
																712.221	2293.94	1826.88	1339.88
																924.499	2314.25	1946.81	1614.88
																1516.9	2324.19	1990.12	2522.19
																1194.64	2420.12	2001.81	2321.19
																2498.28	2450.94	2017.19	2747.19
																2262.84	2520.31	2063.25	2816.94
																1194.64	2557.62	2096.62	2584.12
																1440.94	2596.44	2115.5	1605.12
																280.312	2614.81	2130.44	1803.25
																323.125	2685.5	2142.62	1733.12
																548.375	2689.12	2185.25	2600.88
																627.625	2761.94	2199.44	3045.5
																793.438	2773.19	2209.81	3713
																823	2798	2287.31	3920
																833.625	2805.31	2324.62	3710
																846.625	2833.62	2428.06	3390.75
																852.375	2878.5	2466.25	4982.12
																928.562	2894.06	2514.38	4236.25
																933.125	2904.69	2527.06	4444.94
																954.188	2908.25	2528.19	3585.88
																965.625	2915.88	2634.81	4344.12
																976.625	2977.31	2644.25	2004.81
																979.688	2977.5	2721	2360.31
																995.438	2987.12	2734.69	2289.44
																1011.88	3000.81	2745.62	3126.44
																1015.88	3114.06	2762.06	3173.44
																1018.94	3121.06	2784.06	2351.44
																1036.19	3132.19	2844.81	1829.44
																1039.38	3290.75	2961.56	1269.06
																1058.94	3314.19	3065.81	2379.94
																1079.19	3339.75	3103.5	1371.44
																1120.12	3409.12	3119.25	1873.19
																1182.88	3518.25	3151.31	1998.5
																1185.38	3524.81	3161.44	1434.5
																1188.38	3546.69	3295.81	1600.81
																1211.19	3603.62	3321.44	2018.31
																1238.38	3657.38	3386.25	2420
																1252.12	3699.62	3459.5	2037.62
																1266.56	3750.38	3531	961
																1288.06	3828.88	3564.06	1000.75
																1295.31	3840.94	3797.38	1024.44
																1297.88	3876.19	3804.69	1055.31
																1348.44	3899.12	4371.88	1087.19
																1369.62	3927.62		1091.81
																1372.25	4107.31		1204.25
																1404.38	4331.44		1210.56
																1422.19	4482.12		1247.19
																1424.25	4540.25		1302.19
																1430.62	4640		1334.06
																1433.5	4696.19		1354.12
																1466.12			1378.5
																1487.94			1399.38
																1491.81			1427.12
																1502.19			1448.88
																1509.44			1463.81
																1517.12			1522.81
																1534.75			1553.25
																1540.81			1587.19
																1542.69			1618.88
																1551.81			1657.75
																1554.12			1682.12
																1570.19			1682.31
																1583.94			1683.62
																1589.81			1711.88
																1593.06			1722.44
																1596.5			1747.75
																1596.88			1777.12
																1604.12			1802.5
																1611.69			1867.69
																1621.25			1889.38
																1623.38			1930.38
																1625.69			1931.44
																1626.88			1934.31
																1635.62			1961.19
																1648.06			1970.31
																1670.62			1986.06
																1694.44			1997.56
																1695.44			2012.19
																1700.44			2024.06
																1711.44			2027.56
																1711.62			2048.19
																1725.5			2050.12
																1750.81			2084.5
																1757.38			2103.75
																1763.62			2106.06
																1783.31			2109.12
																1795.94			2129.12
																1800.06			2147.69
																1800.69			2153.31
																1825.62			2253.88
																1880.62			2266.75
																1884.75			2284.31
																1899.81			2290.62
																1906.88			2305.88
																1913.25			2372.06
																1916.81			2394
																1929.12			2404.38
																1939.19			2424.44
																1943.81			2457.31
																1944.69			2498.12
																1977.94			2515.81
																1981.12			2517.75
																1981.75			2523.31
																2005.75			2538.25
																2017.31			2557.38
																2030.75			2569.56
																2036.81			2618.25
																2060			2671.69
																2088.25			2675.31
																2117.31			2702.06
																2126.44			2776.81
																2129.25			2797.56
																2158.94			2977.69
																2177.19			2982.62
																2181.44			3003.06
																2183.5			3051.38
																2199.12			3074.62
																2200.25			3095.06
																2222.62			3154.62
																2225.56			3326.81
																2233.06			3353.69
																2236.31			3490.62
																2255.44			3517.69
																2261.62			3590.44
																2276.88			3609.25
																2287.62			3690.19
																2298.12			3756.75
																2299.25			3818.25
																2337.88			3826.38
																2378.44			4747.12
																2388.81			4930.69
																2390.38
																2398.25
																2412.75
																2423.81
																2424.75
																2428.12
																2432.06
																2433.94
																2452.5
																2458.19
																2462.25
																2476.94
																2485.69
																2495.12
																2520.25
																2523.81
																2527.88
																2528.88
																2545.38
																2568.69
																2570.75
																2581.88
																2596.44
																2600.62
																2614.88
																2635.06
																2637.06
																2667.12
																2670
																2681.06
																2704.38
																2727.81
																2728.25
																2739.38
																2755.56
																2782.88
																2785.12
																2798.44
																2823.12
																2844.25
																2851.31
																2866.31
																2911.81
																2918.69
																2938.12
																2949.62
																2955.06
																2963.94
																3012.38
																3031.06
																3040.81
																3047.62
																3074.25
																3081.38
																3094.38
																3138.25
																3164.94
																3172.25
																3188.25
																3191.38
																3223.94
																3224.81
																3274.31
																3280.31
																3291.25
																3299
																3323.19
																3335.25
																3345.69
																3351.5
																3358.25
																3368.31
																3397
																3421.81
																3424.44
																3437.75
																3449.12
																3461.25
																3485.12
																3494.75
																3498.62
																3517.81
																3527.12
																3545.25
																3552.81
																3559.69
																3566.62
																3573.62
																3609.44
																3612.75
																3628.38
																3695.5
																3715.5
																3732.62
																3867.81
																3874.56
																3892.81
																3912.69
																3970.81
																4068.81
																4112.81
																4133.25
																4401.69
																4495.25
																4542.31
																4552.94
																4684.81
																4766.44
